# Supplementary material for: TwinF interface inhibitor FP802 stops loss of motor neurons and mitigates disease progression in a mouse model of ALS
Source: PubMed Central journal article supplement (PMC10897598; doi:10.1016/j.xcrm.2024.101413), 2024-02-06
Supplement: mmc1.pdf [file mmc1.pdf]

**Cell Reports Medicine, Volume 5**

**Supplemental information**

**TwinF interface inhibitor FP802 stops loss  
of motor neurons and mitigates disease  
progression in a mouse model of ALS**

**Jing Yan, Yu Meng Wang, Andrea Hellwig, and Hilmar Bading**

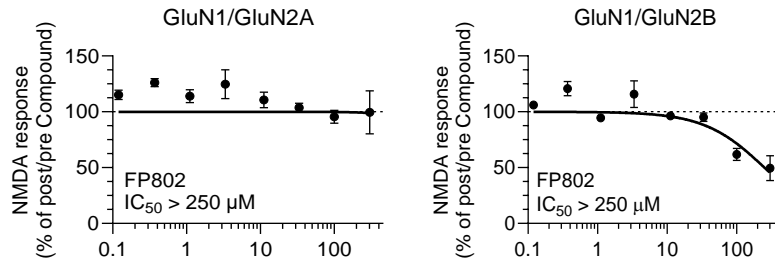

**Figure S1. Analysis of IC<sub>50</sub> values of FP802 for NMDARs in HEK293 cells.** Voltage clamp recordings were performed using the Sophion Qube platform to assess the activation levels of human GluN1/GluN2A or GluN1/GluN2B NMDARs in the presence of FP802. The effects of FP802 on NMDARs were evaluated at +40 mV for eight concentrations (in μM: 0.14, 0.42, 1.2, 3.7, 11.1, 33.3, 100, and 300) in stable HEK293 cell lines expressing human GluN1/GluN2A or GluN1/GluN2B NMDARs. NMDA responses are plotted as the ratio of post/pre compound application and further normalized to 0.3% DMSO as vehicle. IC<sub>50</sub> estimates were generated from logistic fits of the Hill equation to dose-response relationships. D-APV was used as a control with an IC<sub>50</sub> value of 4.5 μM and 4.3 μM for GluN1/GluN2A and GluN1/GluN2B, respectively. Data represent mean ± SEM, n = 3-7 from two independent experiments. Related to Figure 1.

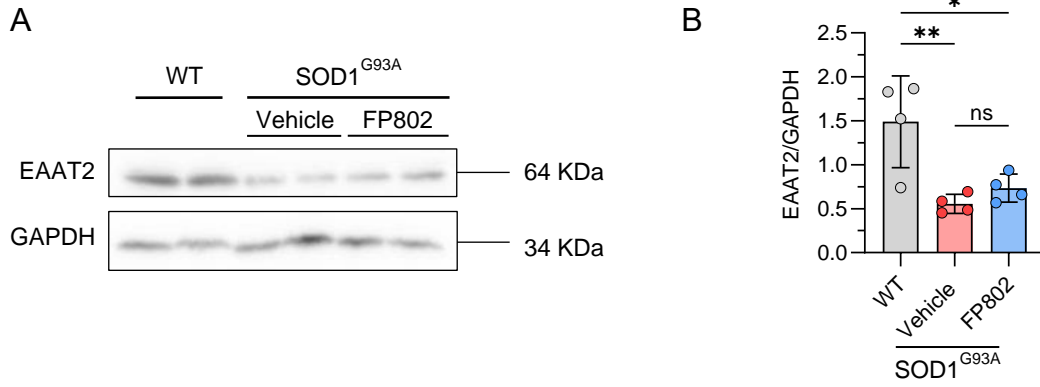

**Figure S2. FP802 treatment does not affect EAAT2/GLT1 expression.** Immunoblot analysis of EAAT2 and GAPDH expression in the lumbar spinal cord of 19-week-old wild type (WT) and in SOD1<sup>G93A</sup> mice treated for 4 weeks with vehicle or FP802 (40 mg/kg/day) starting at week 15. **(A)** Representative immunoblots and **(B)** quantitative analysis. Data represent means ± SD, n = 4; ns: no significance, \*p < 0.05, \*\*p < 0.01, one-way ANOVA followed by Tukey's multiple-comparisons test. Related to Figure 2.

| Assay  | ASCII assay name                             | Ligand or substrate                   | Species | Tissue/Cell                   | % inhibition | Time | Temperature |
|--------|----------------------------------------------|---------------------------------------|---------|-------------------------------|--------------|------|-------------|
| 200510 | Adenosine A1                                 | [3H] DPCPX                            | Human   | recombinant                   | -10.6        | 90   | 25          |
| 200610 | Adenosine A2A                                | [3H] CGS-21680                        | Human   | recombinant                   | 8.7          | 90   | 25          |
| 203110 | Adrenergic alpha1A                           | [3H] Prazosin                         | Human   | recombinant                   | -12.0        | 60   | 25          |
| 203210 | Adrenergic alpha1B                           | [3H] Prazosin                         | Human   | recombinant                   | -6.3         | 60   | 25          |
| 203630 | Adrenergic alpha2A                           | [3H] Rauwolscine                      | Human   | recombinant                   | 1.4          | 60   | 25          |
| 204010 | Adrenergic beta1                             | [125I] Cyanopindolol                  | Human   | recombinant                   | -10.5        | 120  | 25          |
| 204110 | Adrenergic beta2                             | [3H] CGP-12177                        | Human   | recombinant                   | -4.7         | 60   | 25          |
| 204410 | Transporter, Norepinephrine (NET)            | [125I] RTI-55                         | Human   | recombinant                   | -6.9         | 180  | 4           |
| 214600 | Calcium Channel L-Type, Dihydropyridine      | [3H] Nitrendipine                     | Rat     | cerebral cortex               | -3.0         | 90   | 25          |
| 217050 | Cannabinoid CBI                              | [3H] SRI141716A                       | Human   | recombinant                   | 3.5          | 60   | 37          |
| 219500 | Dopamine D1                                  | [3H] SCH-23390                        | Human   | recombinant                   | -1.6         | 120  | 37          |
| 219700 | Dopamine D2S                                 | [3H] Spiperone                        | Human   | recombinant                   | -7.2         | 120  | 25          |
| 226500 | GABAA, Muscimol, Central                     | [3H] Muscimol                         | Rat     | brain (minus cerebellum)      | -7.6         | 10   | 4           |
| 226600 | GABAA, Flunitrazepam, Central                | [3H] Flunitrazepam                    | Rat     | brain (minus cerebellum)      | -0.3         | 60   | 25          |
| 233000 | Glutamate, NMDA, Phencyclidine               | [3H] TCP                              | Rat     | cerebral cortex               | -5.0         | 45   | 25          |
| 239610 | Histamine H1                                 | [3H] Pyrilamine                       | Human   | recombinant                   | 20.5         | 180  | 25          |
| 241000 | Imidazoline I2, Central                      | [3H] Idazoxan                         | Rat     | brain (minus cerebellum)      | -9.2         | 30   | 25          |
| 252710 | Muscarinic M2                                | [3H] N-Methylscopolamine              | Human   | recombinant                   | 1.0          | 120  | 25          |
| 252810 | Muscarinic M3                                | [3H] N-Methylscopolamine              | Human   | recombinant                   | -5.5         | 120  | 25          |
| 258700 | Nicotinic Acetylcholine Alpha1, Bungarotoxin | [125I] alpha-Bungarotoxin             | Human   | RD cells                      | 12.0         | 120  | 25          |
| 258730 | Nicotinic Acetylcholine alpha3beta4          | [125I] Epibatidine                    | Human   | recombinant                   | -6.3         | 60   | 25          |
| 260410 | Opiate mu (OP3, MOP)                         | [3H] Diprenorphine                    | Human   | recombinant                   | 11.0         | 60   | 25          |
| 264500 | Phorbol Ester                                | [3H] PDBu                             | Mouse   | brain (minus cerebellum)      | 21.6         | 60   | 25          |
| 265600 | Potassium Channel [KATP]                     | [3H] Glyburide                        | Hamster | pancreatic HIT-T15 beta cells | -3.9         | 120  | 25          |
| 265900 | Potassium Channel hERG                       | [3H] Astemizole                       | Human   | recombinant                   | -18.4        | 60   | 25          |
| 268420 | Prostanoid EP4                               | [3H] Prostaglandin E2 (PGE2)          | Human   | recombinant                   | 3.7          | 120  | 25          |
| 270000 | Rolipram                                     | [3H] Rolipram                         | Rat     | brain                         | -17.9        | 60   | 4           |
| 271700 | Serotonin (5-Hydroxytryptamine) 5-HT2B       | [3H] Lysergic acid diethylamide (LSD) | Human   | recombinant                   | 2.3          | 60   | 37          |
| 279510 | Sodium Channel, Site 2                       | [3H] Batrachotoxinin                  | Rat     | brain (minus cerebellum)      | -14.5        | 60   | 37          |
| 299034 | Sigma1                                       | [3H] Pentazocine                      | Human   | Jurkat cells                  | 31.3         | 120  | 37          |

**Table S1. Pharmacology safety profile of FP802.**

No significant binding activities of FP802 (10  $\mu$ M) were found in the above-listed assays. Related to Figure 1.

| Hematology                        |                           | SOD1 <sup>G93A</sup> |                  |   |              | Reference    |
|-----------------------------------|---------------------------|----------------------|------------------|---|--------------|--------------|
|                                   |                           | Vehicle              | FP802            | n | Significance | 95% Interval |
| Erythrocytes<br>(Red blood cells) | Erythrocyte (T/L)         | 10.70 ± 0.28         | 10.08 ± 0.38     | 4 | no           | 7.14-12.20   |
|                                   | Reticulocyte (%)          | 4.92 ± 0.32          | 5.10 ± 0.81      | 4 | no           | -            |
|                                   | Hematocrit (%)            | 53.50 ± 3.11         | 50.25 ± 1.71     | 4 | no           | 37.3-62.0    |
|                                   | Anisocytosis (%)          | 0                    | 0                | 4 | n.a.         | -            |
| Leukocytes<br>(White blood cells) | Leukocytes (G/L)          | 2.75 ± 0.51          | 3.53 ± 1.32      | 4 | no           | 4.45-13.96   |
|                                   | Lymphocyte (%)            | 70.75 ± 6.95         | 71.50 ± 5.57     | 4 | no           | -            |
|                                   | Monocyte (%)              | 4.25 ± 2.22          | 4.25 ± 1.26      | 4 | no           | -            |
|                                   | Segmented neutrophils (%) | 24.50 ± 9.43         | 22.50 ± 6.40     | 4 | no           | -            |
|                                   | Band neutrophils          | 0                    | 0                | 4 | n.a.         | -            |
|                                   | Basophils (%)             | 0                    | 0                | 4 | n.a.         | -            |
|                                   | Eosinophils (%)           | 0.50 ± 1.00          | 0.25 ± 0.50      | 4 | no           | -            |
| Other types of cells              | Thrombocytes (G/L)        | 1490.00 ± 188.10     | 1506.00 ± 174.68 | 4 | no           | 841-2159     |
|                                   | Atypical cells            | 0                    | 0                | 4 | n.a.         | -            |
| Other parameters                  | MCV (fL)                  | 50.00 ± 1.41         | 49.75 ± 0.50     | 5 | no           | 42.7-56.0    |
|                                   | MCHC (g/dL)               | 27.75 ± 0.96         | 28.50 ± 0.58     | 5 | no           | 24.6-34.9    |
|                                   | MCH (pg)                  | 13.85 ± 0.19         | 14.00 ± 0.12     | 5 | no           | 11.7-16.3    |
|                                   | Hemoglobin (g/dL)         | 14.83 ± 0.46         | 14.13 ± 0.68     | 5 | no           | 10.8-19.2    |

**Table S2. Hematology of SOD1<sup>G93A</sup> mice treated with vehicle or FP802.**

FP802 delivered with a subcutaneously implanted ALZET osmotic pump at 40 mg/kg/day for 4 weeks starting at 15 weeks of age had no adverse effects on the hematology of SOD1<sup>G93A</sup> mice. References were from Charles River Laboratories datasheets for C57BL6 mice. Related to Figure 2.

| Serum clinical chemistry           |                              | SOD1 <sup>G93A</sup> |                 |   |              | Reference    |
|------------------------------------|------------------------------|----------------------|-----------------|---|--------------|--------------|
|                                    |                              | Vehicle              | FP802           | n | Significance | 95% Interval |
| Liver function-related parameters  | Albumin (g/L)                | 26.80 ± 2.17         | 28.00 ± 1.00    | 5 | no           | 28-38        |
|                                    | Alkaline phosphatase (U/L)   | 80.80 ± 22.72        | 69.40 ± 6.84    | 5 | no           | 111-275      |
|                                    | ALT (U/L)                    | 35.20 ± 3.42         | 32.60 ± 8.30    | 5 | no           | 28-129       |
|                                    | AST (U/L)                    | 177.20 ± 74.85       | 195.20 ± 147.29 | 5 | no           | 46-392       |
|                                    | GGT                          | Not detectable       | Not detectable  | 5 | n.a.         | 0-8          |
| Ions                               | Calcium (mmol/L)             | 2.38 ± 0.08          | 2.35 ± 0.06     | 5 | no           | 2.4-3.2      |
|                                    | Potassium (mmol/L)           | 7.50 ± 3.17          | 9.02 ± 3.83     | 5 | no           | 7.6-11.2     |
|                                    | Sodium (mmol/L)              | 151.8 ± 2.5          | 149.6 ± 3.9     | 5 | no           | 145.2-176.2  |
|                                    | Chloride (mmol/L)            | 112.00 ± 1.00        | 111.20 ± 3.03   | 5 | no           | 110.7-129.8  |
|                                    | Inorganic phosphate (mmol/L) | 3.22 ± 0.61          | 3.26 ± 0.18     | 5 | no           | 2.6-4.7      |
| Kidney function-related parameters | Creatine kinase (U/L)        | 1265 ± 1506          | 1500 ± 1475     | 5 | no           | -            |
|                                    | Creatinine (µmol/L)          | 8.00 ± 3.56          | 9.00 ± 2.16     | 4 | no           | 17.7-44.2    |
| Other parameters                   | Cholesterol (mmol/L)         | 2.52 ± 0.86          | 2.68 ± 0.60     | 5 | no           | 1.8-4.4      |
|                                    | LDH (U/L)                    | 699.5 ± 337.0        | 813.3 ± 474.5   | 5 | no           | -            |
|                                    | Lipase (U/L)                 | 33.25 ± 7.89         | 32.80 ± 4.15    | 4 | no           | -            |
|                                    | Total protein (g/L)          | 48.20 ± 2.95         | 50.00 ± 0.71    | 5 | no           | 48-70        |
|                                    | Triglycerides (g/L)          | 0.62 ± 0.33          | 0.48 ± 0.13     | 5 | no           | 0.67-2.78    |
|                                    | Urea (BUN) (mmol/L)          | 7.25 ± 1.02          | 7.58 ± 1.32     | 5 | no           | 2.5-10.0     |

**Table S3. Clinical chemistry serum parameters of SOD1<sup>G93A</sup> mice treated with vehicle or FP802.** FP802 delivered with a subcutaneously implanted ALZET osmotic pump at 40 mg/kg/day for 4 weeks starting at 15 weeks of age had no adverse effects on the serum clinical chemistry parameters of SOD1<sup>G93A</sup> mice. References were from Charles River Laboratories datasheets for C57BL6 mice. Related to Figure 2.
