# Supplementary material for: TwinF interface inhibitor FP802 stops loss of motor neurons and mitigates disease progression in a mouse model of ALS
Source: PubMed Central journal article supplement (PMC10897598; doi:10.1016/j.xcrm.2024.101413), 2024-02-06
Supplement: mmc4.pdf [file mmc4.pdf]

# TwinF interface inhibitor FP802 stops loss of motor neurons and mitigates disease progression in a mouse model of ALS

## Graphical abstract

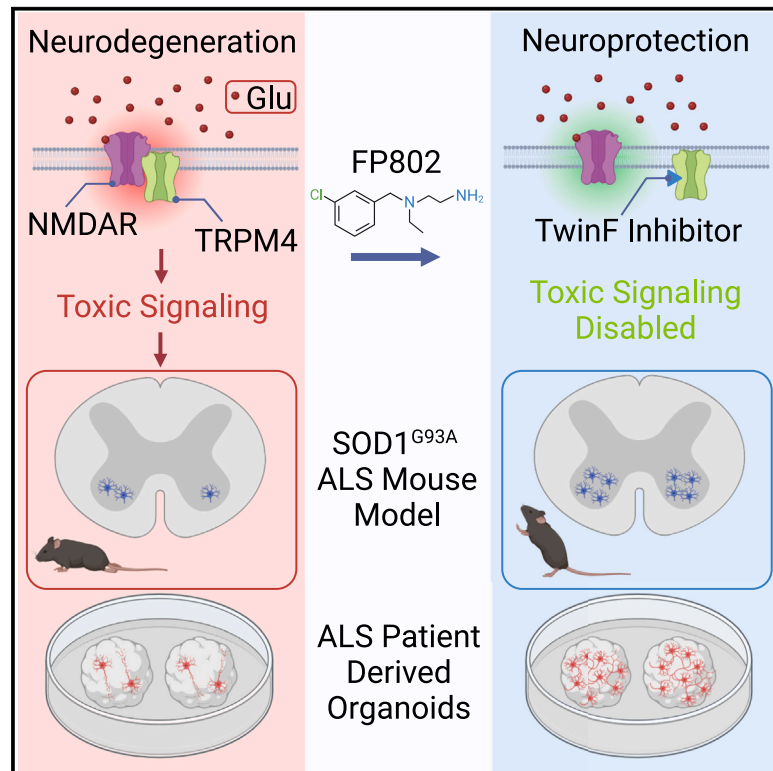

## Authors

Jing Yan, Yu Meng Wang, Andrea Hellwig, Hilmar Bading

## Correspondence

bading@nbio.uni-heidelberg.de

## In brief

Yan et al. find that FP802, which provides neuroprotection by detoxifying eNMDARs through disruption of the NMDAR/TRPM4 complex, halts motor neuron loss in an ALS mouse model, reduces serum NfL levels, improves motor performance, and extends life expectancy. FP802 is also neuroprotective in brain organoids derived from ALS patients.

## Highlights

- eNMDARs promote ALS disease progression via the NMDAR/TRPM4 death signaling complex
- TwinF interface inhibitor FP802 disrupts the NMDAR/TRPM4 death signaling complex
- FP802 is therapeutically effective in an ALS mouse model
- FP802 protects against NMDA-induced death in brain organoids from ALS patient iPSCs

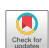

## Report

# TwinF interface inhibitor FP802 stops loss of motor neurons and mitigates disease progression in a mouse model of ALS

Jing Yan,<sup>1,2</sup> Yu Meng Wang,<sup>1</sup> Andrea Hellwig,<sup>1</sup> and Hilmar Bading<sup>1,3,\*</sup><sup>1</sup>Department of Neurobiology, Interdisciplinary Center for Neurosciences (IZN), Heidelberg University, 69120 Heidelberg, Germany<sup>2</sup>Present address: FundaMental Pharma GmbH, 69120 Heidelberg, Germany<sup>3</sup>Lead contact\*Correspondence: [bading@nbio.uni-heidelberg.de](mailto:bading@nbio.uni-heidelberg.de)<https://doi.org/10.1016/j.xcrm.2024.101413>

## SUMMARY

Toxic signaling by extrasynaptic NMDA receptors (eNMDARs) is considered an important promoter of amyotrophic lateral sclerosis (ALS) disease progression. To exploit this therapeutically, we take advantage of TwinF interface (TI) inhibition, a pharmacological principle that, contrary to classical NMDAR pharmacology, allows selective elimination of eNMDAR-mediated toxicity via disruption of the NMDAR/TRPM4 death signaling complex while sparing the vital physiological functions of synaptic NMDARs. Post-disease onset treatment of the SOD1<sup>G93A</sup> ALS mouse model with FP802, a modified TI inhibitor with a safe pharmacology profile, stops the progressive loss of motor neurons in the spinal cord, resulting in a reduction in the serum biomarker neurofilament light chain, improved motor performance, and an extension of life expectancy. FP802 also effectively blocks NMDA-induced death of neurons in ALS patient-derived forebrain organoids. These results establish eNMDAR toxicity as a key player in ALS pathogenesis. TI inhibitors may provide an effective treatment option for ALS patients.

## INTRODUCTION

Amyotrophic lateral sclerosis (ALS) is the most frequent adult-onset human motor neuron disease. It affects both upper motor neurons in the cerebral cortex and lower motor neurons in the brain stem and spinal cord.<sup>1–3</sup> ALS is untreatable, progresses rapidly, disables voluntary muscle movement, and causes death by respiratory failure. While in approximately 10% of affected individuals the disease is caused by mutations in one or several genes, for the majority of ALS cases, the origin of the disease is unknown.<sup>1–5</sup> Both the inherited, familial forms of ALS and the much more common sporadic form share deficits in expression or function of excitatory amino acid transporters (EAATs). This leads to glutamate leakage from the synaptic cleft and increases extracellular glutamate concentrations to neurotoxic levels.<sup>6–9</sup> NMDA receptors (NMDARs), in particular those located outside synaptic contacts that initiate toxic signaling, have been implicated as initiators of death signaling in ALS<sup>5,10,11</sup> as well as in other neurodegenerative diseases.<sup>12,13</sup> However, the precise role of extrasynaptic NMDARs (eNMDARs) in ALS remains largely unexplored. Despite the availability of potent NMDAR blockers,<sup>14</sup> pharmacology studies face difficulties in their interpretation due to the dual function of NMDARs in the brain. eNMDARs are the primary mediator of glutamate-induced neuronal cell death,<sup>11–13,15,16</sup> while synaptic NMDARs (sNMDARs) control synaptic plasticity-related events and cognitive functions.<sup>17</sup> Classical NMDAR blockers do not distinguish between

NMDARs located outside and inside the synapse and thus eliminate not only the toxic actions but also the physiological functions.<sup>14</sup> This limits their value for animal studies of neurodegenerative diseases and their suitability as therapeutics in clinical trials.<sup>18,19</sup> A recent investigation into the destructive nature of eNMDARs led to the discovery that their physical interaction with the transient receptor potential cation channel subfamily M member 4 (TRPM4) is responsible for their toxic signaling.<sup>20,21</sup> This mechanistic insight provided the basis for the development of a class of small-molecule neuroprotective drugs, termed TwinF interface (TI) inhibitors. TI inhibitors disrupt the NMDAR/TRPM4 death signaling complex through binding to the TwinF domain, the TRPM4 interaction interface responsible for the NMDAR/TRPM4 complex formation.<sup>20,21</sup> TI inhibitors selectively eliminate toxic signaling of eNMDARs while sparing the physiological functions of sNMDARs.<sup>20,21</sup> In this study, we first explored the chemical space of compound 8, a prototype TI inhibitor. This yielded a safe and potent neuroprotectant, FP802, which was subsequently used to investigate the role of eNMDARs in the pathogenesis of ALS.

## RESULTS

TI inhibitors provide neuroprotection by disrupting a death signaling complex consisting of eNMDARs and TRPM4 that is primarily responsible for NMDAR-mediated glutamate neurotoxicity.<sup>20</sup> Compound 8, the prototype TI inhibitor, virtually

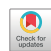

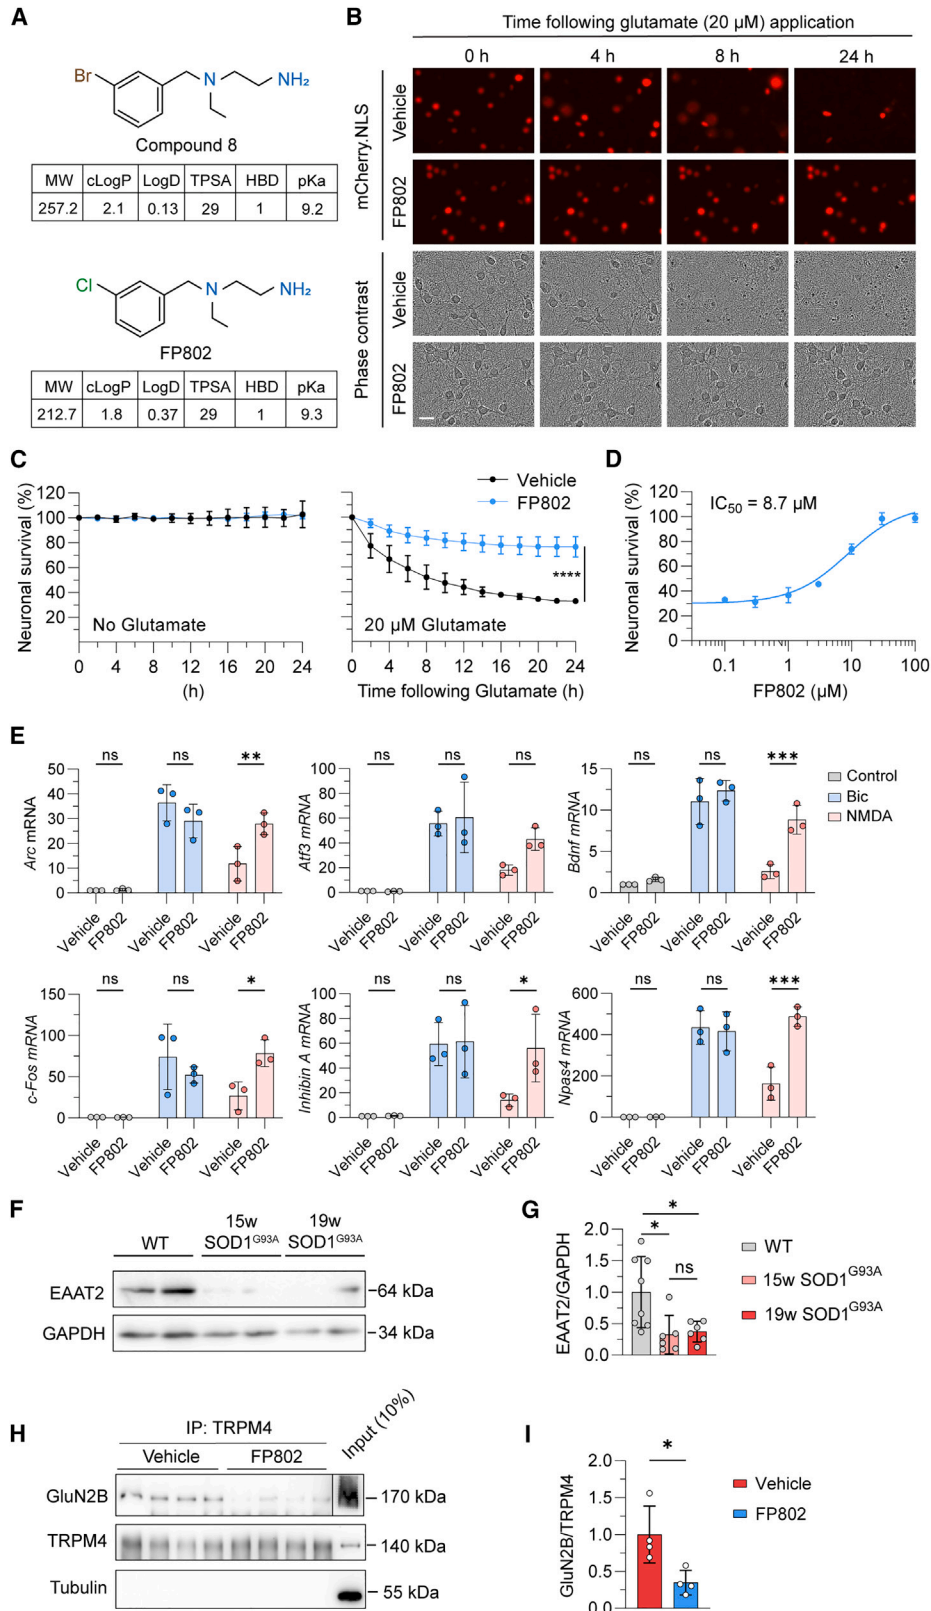

(legend on next page)

eliminates the pathological triad characteristic of toxic signaling of eNMDARs,<sup>20</sup> which includes loss of structural integrity of neurons, CREB shut-off and transcriptional deregulation, and mitochondrial dysfunction.<sup>11</sup> Compound 8 is a potent neuroprotectant both in neuronal cell culture and *in vivo* in mouse models of stroke and retinal degeneration.<sup>20</sup> Because compound 8 contains a phenyl bromide,<sup>20</sup> it may upon breakdown liberate bromide or methyl bromide, which could cause irritations and poisoning.<sup>22,23</sup> This raises concerns about long-term *in vivo* applicability of compound 8 and prompted us to generate variants of compound 8 lacking bromide. This yielded FP802, a phenyl chloride containing derivative of compound 8 with similar physicochemical parameters (Figure 1A) and potent protective activity against glutamate-mediated neurotoxicity (IC<sub>50</sub> 8.7 μM; Figures 1B–1D). Similar to compound 8, FP802 eliminated the transcriptional shut-off induced by eNMDARs and boosted the NMDA bath application-induced expression of the immediate-early genes (IEGs) *Atf3*, *Arc*, *Bdnf*, *cFos*, *Inhibin beta A*, and *Npas4* to reach levels that were comparable to those achieved by bicuculline-induced action potential bursting (Figure 1E), which activates transcription-promoting signaling by sNMDARs.<sup>10,16,20</sup> Electrophysiology experiments revealed that similar to compound 8,<sup>20</sup> FP802 did not block NMDARs expressed heterologously in HEK293 cells (IC<sub>50</sub> > 250 μM for both, GluN1/GluN2A and GluN1/GluN2B) (Figure S1). In addition, we investigated pharmacology safety of FP802 using radioligand binding assays for 30 common targets and found no significant interaction with any target tested (Table S1).

We next used FP802 in the transgenic SOD1<sup>G93A</sup> mouse model of ALS that expresses mutant human SOD1 with a glycine to alanine substitution at position 93 and whose general features resemble ALS in humans.<sup>24,25</sup> SOD1<sup>G93A</sup> mice represent a widely accepted animal model used extensively in ALS drug discovery to evaluate the efficacy of compounds now in clinical trials, which include masitinib, pridopidine, fasudil, guanabenz, and AMX0035.<sup>26–32</sup> We first confirmed using immunoblot analysis the reduction of EAAT2/GLT-1 expression in the spinal cord of SOD1<sup>G93A</sup> mice (Figures 1F and 1G). Deregulation of glutamate uptake systems may lead to an increase in toxic eNMDAR signaling, which could be the cause of motor neuron death. To test this hypothesis, we applied FP802 subcutaneously to SOD1<sup>G93A</sup> mice using an implanted ALZET osmotic mini pump to achieve a steady release of the drug. FP802 readily crossed

the mouse blood-spinal cord barrier and reached concentrations in the spinal cord of  $7.54 \pm 4.79$  nmol/g ( $n = 3$ ), corresponding to approximately 3–12 μM FP802, when applied at 40 mg/kg/day for 2 weeks. Co-immunoprecipitation experiments using lysates from mouse spinal cord revealed that in samples from FP802-treated mice, the interaction of TRPM4 with the NMDAR subunit GluN2B was disrupted (Figures 1H and 1I). Following successful deactivation of the NMDAR/TRPM4 death signaling complex by FP802 *in vivo*, we next assessed potential therapeutic benefits of FP802 in SOD1<sup>G93A</sup> mice. To implement an experimental design that resembles a clinical situation, we started treatment of SOD1<sup>G93A</sup> mice with FP802 at the time of onset of motor deficits, which was around week 15.<sup>33,34</sup> SOD1<sup>G93A</sup> mice treated with FP802 for the subsequent 4 weeks had significantly better neurological scores and lower body weight losses compared to control-vehicle-treated animals (Figures 2A–2C). Moreover, SOD1<sup>G93A</sup> mice had a significantly improved motor performance based on the total distances traveled in an open field and showed frequent rearing behavior during which the animals raise their forelimbs from the ground putting their entire weight on their hind legs (Figures 2D and 2E; Videos S1 and S2).

FP802 treatment also significantly extended the lifespan of SOD1<sup>G93A</sup> mice (Figure 2F; survival median increased from 151 to 164 days), which may be due to the enhanced survival of spinal motor neurons. To investigate this, we assessed the death of spinal motor neurons in FP802-treated SOD1<sup>G93A</sup> mice. Immunohistochemical analyses revealed that already at disease onset at 15 weeks, i.e., before the start of FP802 administration, the number of lumbar spinal motor neurons identified by the choline acetyltransferase (ChAT) marker was significantly lower in SOD1<sup>G93A</sup> mice compared to healthy wild-type (WT) littermates (Figures 2G and 2H). We also observed at 15 weeks of age a shift in the size distribution of lumbar spinal motor neurons toward smaller soma sizes in SOD1<sup>G93A</sup> mice compared to WT (Figure 2I). In control-vehicle-treated SOD1<sup>G93A</sup> mice, the number of lumbar spinal motor neurons further decreased dramatically within the subsequent 4 weeks, whereas in FP802-treated animals, no additional death was observed at week 19 (Figures 2G and 2H). In addition, size distribution analysis revealed that at week 19, the soma sizes of lumbar spinal motor neurons from FP802-treated SOD1<sup>G93A</sup> mice were larger than the soma sizes of lumbar spinal motor neurons from control-treated SOD1<sup>G93A</sup> mice (Figure 2I). The neuroinflammatory

### Figure 1. FP802 is neuroprotective, boosts gene expression, and disrupts the NMDAR/TRPM4 complex

(A) Chemical structures and physicochemical parameters of compound 8 and FP802. MW, molecular weight; cLogP, calculated logarithm of partition coefficient; LogD, logarithm of distribution coefficient; TPSA, topological polar surface area; HBD, hydrogen bond donor; pKa, logarithm of acid dissociation constant. (B–D) FP802 protects primary mouse cortical neurons from glutamate neurotoxicity. (B) Representative time series images of primary cortical neurons, expressing mCherry-NLS, following glutamate insult. Scale bar, 20 μm. (C and D) Analysis of the percentage of nuclear mCherry-positive neurons with or without treatment with FP802 and with or without subsequent exposure to 20 μM glutamate, which is the EC<sub>50</sub> of glutamate for death of cortical neurons. The IC<sub>50</sub> of FP802 is 8.7 μM. Data represent means ± SD,  $n = 3$ ; \*\*\*\* $p < 0.0001$ , unpaired t test. (E) FP802 restores impaired IEG expression induced by excitotoxic stimulation. Primary mouse cortical neurons were pre-incubated with FP802 (10 μM) or vehicle for 30 min before a 2-h treatment with either bicuculline (Bic, 50 μM) to induce action potential (AP) bursting or NMDA (20 μM) to induce excitotoxic insults. The mRNA levels of *Arc*, *Atf3*, *Bdnf*, *c-Fos*, *Inhibin beta A*, and *Npas4* were assessed by RT-qPCR. Data represent means ± SD,  $n = 3$ ; ns: no significant difference, \* $p < 0.05$ , \*\* $p < 0.01$ , \*\*\* $p < 0.001$ , two-way ANOVA followed by Dunnett's multiple comparisons. (F and G) Immunoblot analysis of EAAT2 and GAPDH expression in the lumbar spinal cord of 19-week-old wild-type (WT) and SOD1<sup>G93A</sup> mice. Data represent means ± SD,  $n = 6-8$ ; \* $p < 0.05$ , Brown-Forsythe and Welch ANOVA test followed by Dunnett's T3 multiple-comparisons test. (H and I) Co-immunoprecipitation with anti-TRPM4 antibodies of the NMDAR/TRPM4 complex from lumbar spinal cord lysates of animals treated with vehicle or FP802. In (H), compared to the GluN2B signals in the "Vehicle" and "FP802" lanes, the GluN2B signal in the "Input" lane originates from a shorter exposure time during digital imaging of the chemiluminescent signal. Data represent means ± SD,  $n = 4$ ; \* $p < 0.05$ , unpaired t test.

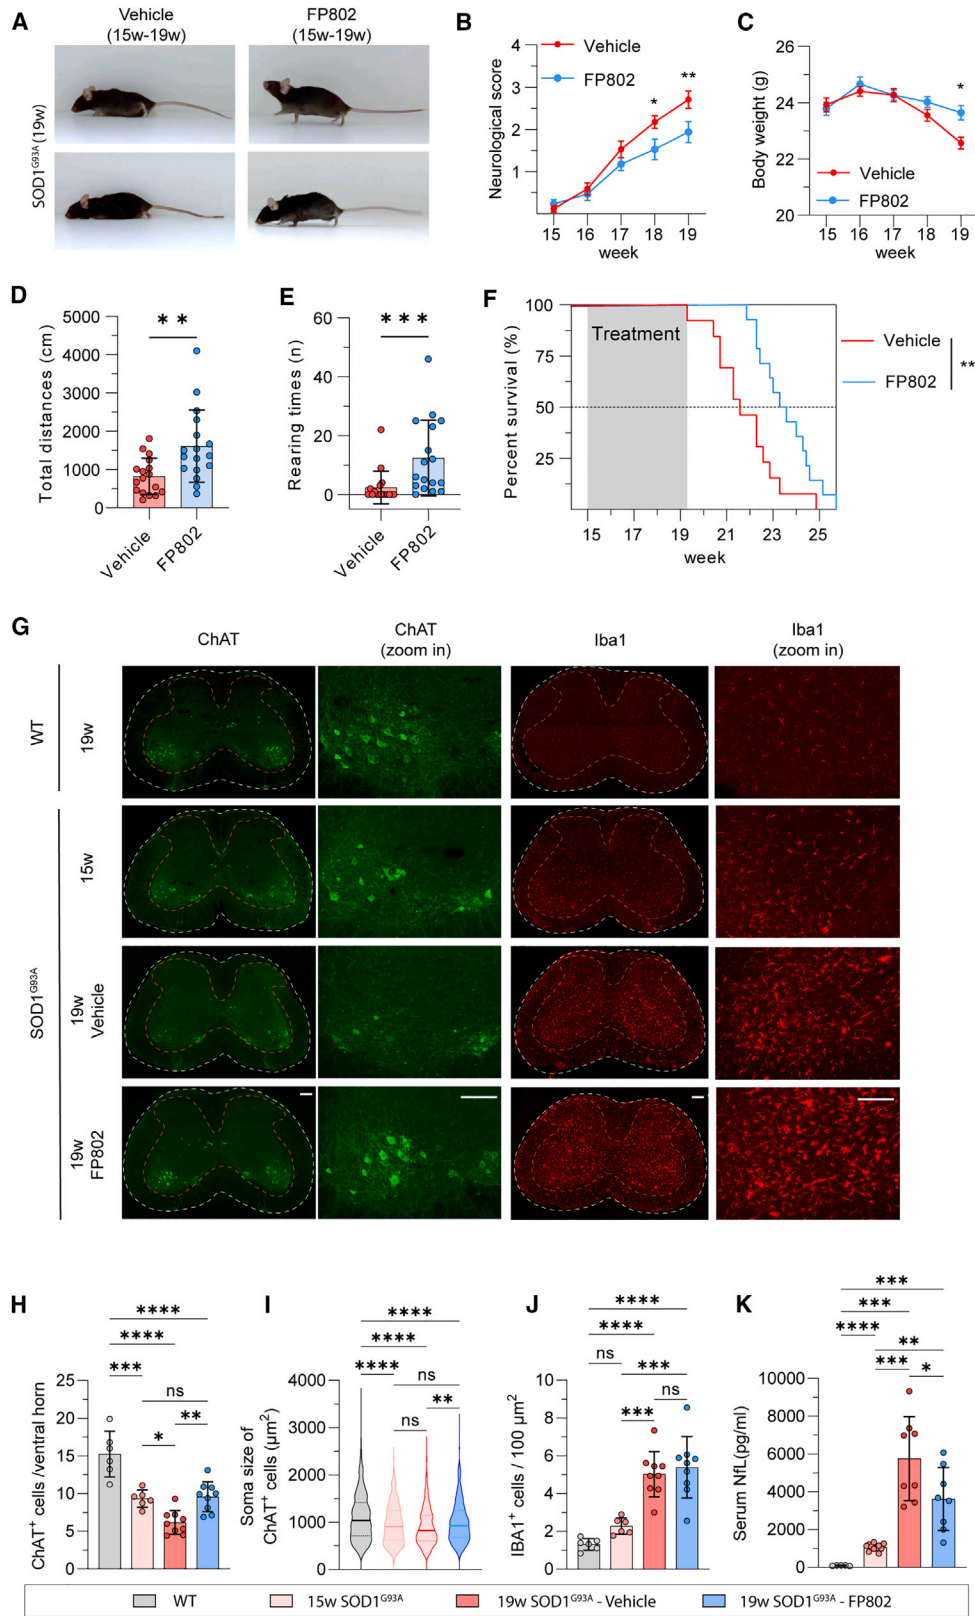

(legend on next page)

response associated with the spinal cord pathology in SOD1<sup>G93A</sup> mice, assessed using the microglia marker Iba1, was not affected by FP802 treatment (Figures 2G and 2J). However, neuroprotection of spinal motor neurons by FP802 was accompanied by a reduction of serum levels of neurofilament light (NfL) chain, a biomarker used in ALS patients to monitor disease progression (Figure 2K).<sup>35,36</sup> As FP802 had no significant effect on EAAT/GLT-1 expression (Figure S2), these results strongly suggest that toxic eNMDAR signaling is an important driver of motor neuron degeneration and death in SOD1<sup>G93A</sup> ALS mice. To assess possible adverse effects of FP802 treatment on liver, kidney, and heart, we monitored a panel of serum parameters and blood cell counts. The values measured did not differ significantly between untreated and FP802-treated animals (Tables S2 and S3).

We finally investigated the translatability of the animal data to human neurons and used induced pluripotent stem cells (iPSCs) derived from patients with either a sporadic or the SOD1<sup>G94A</sup> form of ALS that we differentiated into human forebrain organoids (G94A refers to the same mutation as G93A but with different nomenclature; see <https://www.jax.org/strain/004435> for details). Organoids generated from all iPSC lines used in this study express the NMDAR subunits, GluN1, GluN2A, GluN2B, and TRPM4 (Figure 3A). We found that organoids derived from ALS patients with either the sporadic or the SOD1<sup>G94A</sup> form of the disease were more sensitive to NMDAR toxicity than human organoids generated using iPSCs from healthy controls (Figures 3B and 3C). To identify the cell population vulnerable to NMDAR toxicity, ALS patient-derived organoids were immunostained with antibodies to the nuclear proteins, NeuN and myelin transcription factor 1-like (Myt1L) protein, which identify post-mitotic neurons, and with antibodies to the astrocyte marker, glial fibrillary acidic protein (GFAP). Similar to the results obtained in a previous study in which organoids from healthy donors were analyzed,<sup>37</sup> we found that the number of NeuN-positive and Myt1L-positive post-mitotic neurons was dramatically reduced in ALS patient-derived organoids after NMDA exposure, while GFAP expression remained unchanged (Figures 3D–3G). FP802 effectively blocked, in a dose-dependent manner, the NMDA-induced death of neurons in ALS patient-derived organoids (Figures 3D–3H). These results indicate that toxic eNMDAR signaling is an evolutionary conserved neuronal death process

that can be effectively inhibited by the TI inhibitor FP802 in human neurons from ALS patients.

## DISCUSSION

The results of this study have far-reaching clinical implications. While the SOD1<sup>G93A</sup> mouse model has its limitations and is not necessarily a predictor of results obtained with other animal models of ALS or with ALS patients, our study takes a comprehensive approach by incorporating iPSC-derived neurons from ALS patients with the SOD1<sup>G94A</sup> mutation or the sporadic form of the disease. The consistent neuroprotective effects of FP802 across these diverse human neuronal populations provide solid evidence that our findings have relevance beyond the SOD1<sup>G93A</sup> mouse model of ALS. Blocking the TI with FP802 therefore has potential to be developed into an effective therapy for ALS. Differently from NMDAR blockers, FP802 inhibits ongoing eNMDAR-mediated glutamate neurotoxicity in ALS while leaving unaltered the vital physiological functions of sNMDARs.<sup>20,21</sup> This distinction makes FP802 a promising treatment option for both familial and sporadic forms of ALS that share glutamate neurotoxicity as pathomechanism.<sup>4,6,7,38</sup> Thus, TI inhibitors may exhibit broad applicability and, as such, offer a compelling alternative to the recently developed antisense oligonucleotide therapy,<sup>39</sup> which is tailored exclusively for a small subset of ALS patients with hereditary, monogenic forms of the disease caused, for example, by gain-of-function mutations in SOD1 or C9orf72.<sup>40–42</sup> TI inhibitors may substantially mitigate suffering of ALS patients and extend their life expectancy.

## Limitations of the study

The study is constrained by the challenge of accurately modeling ALS in human organoids. Despite ongoing advancements in the protocols for generating human brain organoids, replication of the precise synaptic circuits associated with ALS remains challenging. This limitation is compounded by the difficulty in generating human motor neurons within organoids that express fully functional NMDARs crucial for studying glutamate neurotoxicity associated with ALS. In our study, we opted for an alternative approach, utilizing human forebrain organoids generated with iPSCs derived from both ALS patients and healthy donors. The

### Figure 2. FP802 improves motor performances, extends lifespan, and prevents motor neuron loss in SOD1<sup>G93A</sup> mice

- (A) Representative images of SOD1<sup>G93A</sup> mice at 19 weeks following 4 weeks of treatment with vehicle or FP802.
- (B–E) Neurological scores, body weight changes, total travel distances, and rearing times of SOD1<sup>G93A</sup> mice following vehicle or FP802 treatment (n = 17 mice in each group). (B and C) Data represent means ± SEM; \*p < 0.05, \*\*p < 0.01, \*\*\*p < 0.001, \*\*\*\*p < 0.0001, two-way RM ANOVA followed by Sidák's multiple comparisons. (D and E) Data represent means ± SD; \*\*p < 0.01, \*\*\*p < 0.001, Mann-Whitney test.
- (F) The lifespan of SOD1<sup>G93A</sup> mice with or without treatment with FP802 for 4 weeks starting at week 15; n = 13–14 mice in each group, \*\*p < 0.01, Gehan-Breslow-Wilcoxon test.
- (G) Representative images of L3–L5 lumbar spinal cord slices of 19-week-old wild type (WT), 15-week-old SOD1<sup>G93A</sup> mice, and of 19-week-old SOD1<sup>G93A</sup> mice with vehicle or FP802 treatment starting at week 15, stained using antibodies to ChAT and Iba1. Scale bar, 200 μm.
- (H) Quantification of ChAT-positive cells in the ventral horn of lumbar spinal cord (L3–L5). Data represent means ± SD, n = 6–9 mice in each group; ns: no significance, \*p < 0.05, \*\*p < 0.01, \*\*\*p < 0.001, \*\*\*\*p < 0.0001, one-way ANOVA followed by Tukey's multiple-comparisons test.
- (I) Distribution of the soma size of ChAT-positive cells from (H) shown in violin plot. Data represent means ± SD, n = 500–900 ChAT-positive cells from 6–9 mice in each group; ns: no significance, \*\*p < 0.01, \*\*\*\*p < 0.0001, one-way ANOVA followed by Tukey's multiple-comparisons test.
- (J) Quantification of signal intensity of Iba1-positive cells in the ventral horn of lumbar spinal cord (L3–L5). Data represent means ± SD, n = 6–9 mice in each group; ns: no significance, \*\*\*p < 0.001, \*\*\*\*p < 0.0001, one-way ANOVA followed by Tukey's multiple-comparisons test.
- (K) Quantification of the neurofilament light chain (NfL) levels in the serum. Data represent means ± SD, n = 5–11 mice in each group; \*p < 0.05, \*\*p < 0.01, \*\*\*p < 0.001, Brown-Forsythe and Welch ANOVA followed by unpaired t test with Welch's correction multiple comparison.

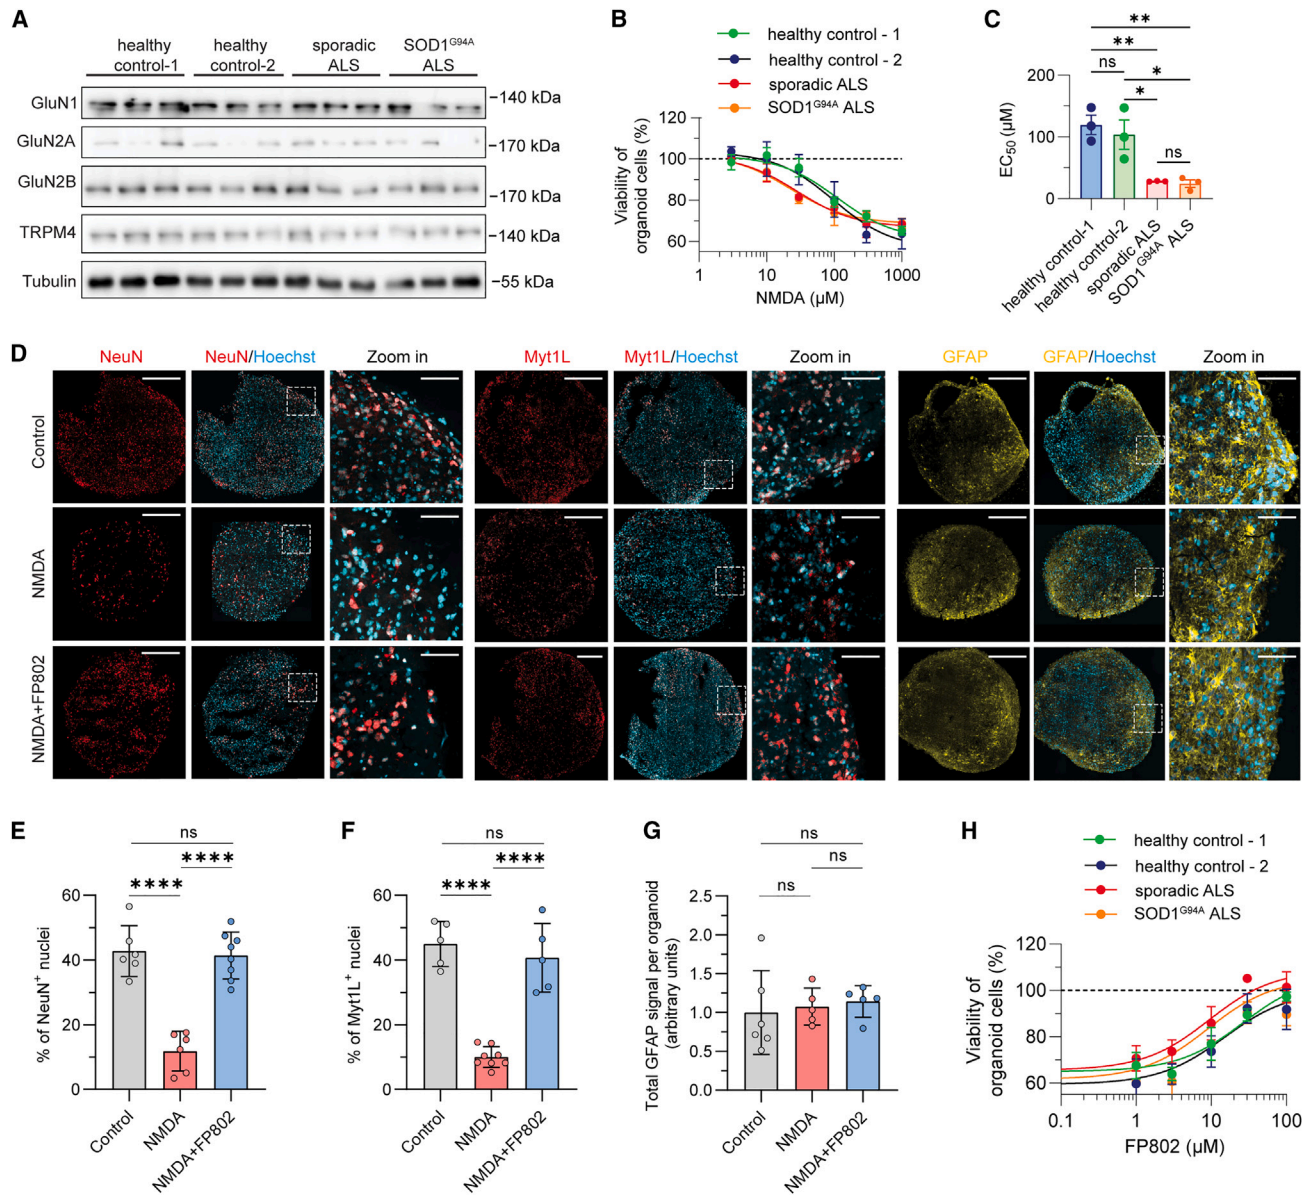

**Figure 3. FP802 protects human brain organoids generated using iPSCs from ALS patients or healthy controls against NMDA-induced neurotoxicity**

(A) Immunoblot analysis of GluN1, GluN2A, GluN2B, TRPM4, and tubulin expression in human iPSC-derived forebrain organoids. For each iPSC-line-derived organoid, 3 independently generated lysates from 2 to 3 organoids each were analyzed.

(B) Nonlinear fit of viability of forebrain organoid cells following NMDA treatment. The EC<sub>50</sub> value was calculated with the agonist concentration plotted against response (three parameters). Data represent means ± SEM, n = 3 with 2–3 organoids in each experiment.

(C) Statistical analysis of EC<sub>50</sub> values from (B). Data represent means ± SD; ns: no significance, \*p < 0.05, \*\*p < 0.01, one-way ANOVA followed by Tukey's multiple-comparisons test.

(D–G) FP802 protects post-mitotic neurons in forebrain organoids generated from sporadic ALS patient-derived iPSCs against NMDA-induced neurotoxicity. (D) Representative images of untreated organoids (Control) and organoids treated with NMDA (300 μM for 24 h) without or with pre-treatment for 30 min with 30 μM FP802 and stained with Hoechst 33258 and using antibodies to NeuN, Myt1L, and GFAP. Scale bar, 500 μm. Scale bar in zoomed-in images, 50 μm.

(E–G) Quantification of the immunostainings in (D). NeuN-positive (NeuN<sup>+</sup>) cells (E) and Myt1L-positive (Myt1L<sup>+</sup>) cells (F) were counted in confocal section z stacks of whole organoids (n = 5–8 organoids from 2 batches) and expressed as a percentage of total Hoechst-stained nuclei. GFAP staining (G) was quantified by measuring the fluorescent signals of z stacks of confocal sections of whole organoids (n = 5–6 organoids from 2 batches) and expressed as arbitrary units. Data represent means ± SD; ns: no significance, \*\*\*\*p < 0.0001, one-way ANOVA followed by Tukey's multiple-comparisons test.

(H) Nonlinear fit of protection by FP802 of forebrain organoids against NMDA-induced neurotoxicity; NMDA, 300 μM. IC<sub>50</sub> values (in μM: healthy control-1: 26; healthy control-2: 15; sporadic ALS: 9.3; SOD1<sup>G94A</sup> ALS: 9.0) were calculated with FP802 concentration versus response (three parameters). Data represent means ± SEM, n = 3 with 2–3 organoids in each experiment.

implemented cell culture protocol yielded human forebrain organoids that exhibited sensitivity to NMDA-induced neurotoxicity, enabling us to assess the effectiveness of FP802 in human neurons. A crucial next step toward clinical translation is to demonstrate the neuroprotective effects of FP802 in mature human motor neurons with fully functional NMDARs within an ALS organoid system.

### STAR★METHODS

Detailed methods are provided in the online version of this paper and include the following:

- **KEY RESOURCES TABLE**
- **RESOURCE AVAILABILITY**
  - Lead contact
  - Materials availability
  - Data and code availability
- **EXPERIMENTAL MODEL AND STUDY PARTICIPANT DETAILS**
  - Animals
  - Primary neuronal cultures
  - HEK293 cells
  - Human iPSC-derived forebrain organoids
- **METHOD DETAILS**
  - Synthesis of FP802
  - Glutamate neurotoxicity assay in primary cortical neurons
  - Recombinant adeno-associated virus (rAAV) and expression vectors
  - Immunoprecipitation and immunoblot analysis
  - Assessment of disease progression in SOD1<sup>G93A</sup> mice
  - Open field test for SOD1<sup>G93A</sup> mice
  - Immunohistochemistry
  - Hematology, clinical chemistry and neurofilament light chain
  - Pharmacology safety screening of FP802
  - Automated patch clamp
  - NMDA-induced neurotoxicity in human iPSC-derived organoids
- **QUANTIFICATION AND STATISTICAL ANALYSIS**

### SUPPLEMENTAL INFORMATION

Supplemental information can be found online at <https://doi.org/10.1016/j.xcrm.2024.101413>.

### ACKNOWLEDGMENTS

We thank Iris Bünzli-Ehret for her help with the preparation of neuronal cultures, Claudia Pitzer, Interdisciplinary Neurobehavioral Core (INBC) at Heidelberg University, for her advice on the SOD1<sup>G93A</sup> mice, and the staff at INBC for their assistant in breeding the mice. We thank FundaMental Pharma GmbH (Heidelberg, Germany) for providing pharmacology safety data of FP802, Moritz Mall for providing the antibody to Myt1L, and Jochen Utikal for providing the D1 and HD6 cell lines. The study is funded by the Deutsche Forschungsgemeinschaft (DFG) Deutsch-Israelische Projektkooperation BA 1007/7-1 (H.B.), European Research Council (ERC) Advanced Grant 233024 (H.B.), DFG Forschergruppe FOR 2289 (H.B.), and an Alexander von Humboldt Foundation Research Fellowship for Postdocs (Y.M.W.).

### AUTHOR CONTRIBUTIONS

H.B. and J.Y. contributed to the conception and design of the study; J.Y., Y.M.W., and A.H. contributed to the acquisition and analysis of data; H.B. and J.Y. contributed to drafting the text and preparing the figures.

### DECLARATION OF INTERESTS

H.B. and J.Y. are named inventors of the patent application for a novel class of neuroprotectants (PCT/EP2018/078577); H.B. is co-founder of FundaMental Pharma GmbH, Heidelberg, Germany, which licenses FP802; H.B. and J.Y. are shareholders of FundaMental Pharma GmbH.

Received: May 27, 2023

Revised: October 16, 2023

Accepted: January 14, 2024

Published: February 6, 2024

### REFERENCES

1. Cleveland, D.W., and Rothstein, J.D. (2001). From Charcot to Lou Gehrig: deciphering selective motor neuron death in ALS. *Nat. Rev. Neurosci.* 2, 806–819. <https://doi.org/10.1038/35097565>.
2. Hardiman, O., Al-Chalabi, A., Chio, A., Corr, E.M., Logroscino, G., Robbercht, W., Shaw, P.J., Simmons, Z., and van den Berg, L.H. (2017). Amyotrophic lateral sclerosis. *Nat. Rev. Dis. Prim.* 3, 17071. <https://doi.org/10.1038/nrdp.2017.71>.
3. Brown, R.H., and Al-Chalabi, A. (2017). Amyotrophic Lateral Sclerosis. *N. Engl. J. Med.* 377, 162–172. <https://doi.org/10.1056/NEJMra1603471>.
4. Taylor, J.P., Brown, R.H., Jr., and Cleveland, D.W. (2016). Decoding ALS: from genes to mechanism. *Nature* 539, 197–206. <https://doi.org/10.1038/nature20413>.
5. Kiernan, M.C., Vucic, S., Cheah, B.C., Turner, M.R., Eisen, A., Hardiman, O., Burrell, J.R., and Zoing, M.C. (2011). Amyotrophic lateral sclerosis. *Lancet* 377, 942–955. [https://doi.org/10.1016/s0140-6736\(10\)61156-7](https://doi.org/10.1016/s0140-6736(10)61156-7).
6. Rothstein, J.D., Tsai, G., Kuncl, R.W., Clawson, L., Cornblath, D.R., Drachman, D.B., Pestronk, A., Stauch, B.L., and Coyle, J.T. (1990). Abnormal excitatory amino acid metabolism in amyotrophic lateral sclerosis. *Ann. Neurol.* 28, 18–25. <https://doi.org/10.1002/ana.410280106>.
7. Rothstein, J.D., Kuncl, R., Chaudhry, V., Clawson, L., Cornblath, D.R., Coyle, J.T., and Drachman, D.B. (1991). Excitatory amino acids in amyotrophic lateral sclerosis: an update. *Ann. Neurol.* 30, 224–225. <https://doi.org/10.1002/ana.410300223>.
8. Rothstein, J.D., Martin, L.J., and Kuncl, R.W. (1992). Decreased glutamate transport by the brain and spinal cord in amyotrophic lateral sclerosis. *N. Engl. J. Med.* 326, 1464–1468. <https://doi.org/10.1056/NEJM199205283262204>.
9. Rothstein, J.D., Van Kammen, M., Levey, A.I., Martin, L.J., and Kuncl, R.W. (1995). Selective loss of glial glutamate transporter GLT-1 in amyotrophic lateral sclerosis. *Ann. Neurol.* 38, 73–84. <https://doi.org/10.1002/ana.410380114>.
10. Hardingham, G.E., Fukunaga, Y., and Bading, H. (2002). Extrasynaptic NMDARs oppose synaptic NMDARs by triggering CREB shut-off and cell death pathways. *Nat. Neurosci.* 5, 405–414. <https://doi.org/10.1038/nn835>.
11. Lipton, S.A., and Rosenberg, P.A. (1994). Excitatory amino acids as a final common pathway for neurologic disorders. *N. Engl. J. Med.* 330, 613–622. <https://doi.org/10.1056/NEJM199403033300907>.
12. Bading, H. (2017). Therapeutic targeting of the pathological triad of extrasynaptic NMDA receptor signaling in neurodegenerations. *J. Exp. Med.* 214, 569–578. <https://doi.org/10.1084/jem.20161673>.
13. Parsons, M.P., and Raymond, L.A. (2014). Extrasynaptic NMDA receptor involvement in central nervous system disorders. *Neuron* 82, 279–293. <https://doi.org/10.1016/j.neuron.2014.03.030>.



14. Ogden, K.K., and Traynelis, S.F. (2011). New advances in NMDA receptor pharmacology. *Trends Pharmacol. Sci.* 32, 726–733. <https://doi.org/10.1016/j.tips.2011.08.003>.
15. Choi, D.W., Maulucci-Gedde, M., and Kriegstein, A.R. (1987). Glutamate neurotoxicity in cortical cell culture. *J. Neurosci.* 7, 357–368.
16. Hardingham, G.E., and Bading, H. (2010). Synaptic versus extrasynaptic NMDA receptor signalling: implications for neurodegenerative disorders. *Nat. Rev. Neurosci.* 11, 682–696. <https://doi.org/10.1038/nrn2911>.
17. Morris, R.G.M. (2013). NMDA receptors and memory encoding. *Neuropharmacology* 74, 32–40. <https://doi.org/10.1016/j.neuropharm.2013.04.014>.
18. Muir, K.W. (2006). Glutamate-based therapeutic approaches: clinical trials with NMDA antagonists. *Curr. Opin. Pharmacol.* 6, 53–60. <https://doi.org/10.1016/j.coph.2005.12.002>.
19. Ikonomidou, C., and Turski, L. (2002). Why did NMDA receptor antagonists fail clinical trials for stroke and traumatic brain injury? *Lancet Neurol.* 1, 383–386. [https://doi.org/10.1016/s1474-4422\(02\)00164-3](https://doi.org/10.1016/s1474-4422(02)00164-3).
20. Yan, J., Bengtson, C.P., Buchthal, B., Hagenston, A.M., and Bading, H. (2020). Coupling of NMDA receptors and TRPM4 guides discovery of unconventional neuroprotectants. *Science* 370, eaay3302. <https://doi.org/10.1126/science.aay3302>.
21. Yan, J., and Bading, H. (2023). The Disruption of NMDAR/TRPM4 Death Signaling with TwinF Interface Inhibitors: A New Pharmacological Principle for Neuroprotection. *Pharmaceuticals* 16, 1085. <https://doi.org/10.3390/ph16081085>.
22. van Leeuwen, F.X., and Sangster, B. (1987). The toxicology of bromide ion. *Crit. Rev. Toxicol.* 18, 189–213. <https://doi.org/10.3109/10408448709089861>.
23. Bulathsinghala, A.T., and Shaw, I.C. (2014). The toxic chemistry of methyl bromide. *Hum. Exp. Toxicol.* 33, 81–91. <https://doi.org/10.1177/0960327113493299>.
24. Gurney, M.E., Pu, H., Chiu, A.Y., Dal Canto, M.C., Polchow, C.Y., Alexander, D.D., Caliendo, J., Hentati, A., Kwon, Y.W., Deng, H.X., et al. (1994). Motor neuron degeneration in mice that express a human Cu,Zn superoxide dismutase mutation. *Science* 264, 1772–1775. <https://doi.org/10.1126/science.8209258>.
25. Phillips, T., and Rothstein, J.D. (2015). Rodent Models of Amyotrophic Lateral Sclerosis. *Curr. Protoc. Pharmacol.* 69, 5.67.1. <https://doi.org/10.1002/0471141755.ph0567s69>.
26. Günther, R., Balck, A., Koch, J.C., Nientiedt, T., Sereda, M., Bähr, M., Lingor, P., and Tönges, L. (2017). Rho Kinase Inhibition with Fasudil in the SOD1(G93A) Mouse Model of Amyotrophic Lateral Sclerosis-Symptomatic Treatment Potential after Disease Onset. *Front. Pharmacol.* 8, 17. <https://doi.org/10.3389/fphar.2017.00017>.
27. Takata, M., Tanaka, H., Kimura, M., Nagahara, Y., Tanaka, K., Kawasaki, K., Seto, M., Tsuruma, K., Shimazawa, M., and Hara, H. (2013). Fasudil, a rho kinase inhibitor, limits motor neuron loss in experimental models of amyotrophic lateral sclerosis. *Br. J. Pharmacol.* 170, 341–351. <https://doi.org/10.1111/bph.12277>.
28. Estévez-Silva, H.M., Mediavilla, T., Giacobbo, B.L., Liu, X., Sultan, F.R., and Marcellino, D.J. (2022). Pridopidine modifies disease phenotype in a SOD1 mouse model of amyotrophic lateral sclerosis. *Eur. J. Neurosci.* 55, 1356–1372. <https://doi.org/10.1111/ejn.15608>.
29. Tönges, L., Günther, R., Suhr, M., Jansen, J., Balck, A., Saal, K.A., Barski, E., Nientiedt, T., Götz, A.A., Koch, J.C., et al. (2014). Rho kinase inhibition modulates microglia activation and improves survival in a model of amyotrophic lateral sclerosis. *Glia* 62, 217–232. <https://doi.org/10.1002/glia.22601>.
30. Jiang, H.Q., Ren, M., Jiang, H.Z., Wang, J., Zhang, J., Yin, X., Wang, S.Y., Qi, Y., Wang, X.D., and Feng, H.L. (2014). Guanabenz delays the onset of disease symptoms, extends lifespan, improves motor performance and attenuates motor neuron loss in the SOD1 G93A mouse model of amyotrophic lateral sclerosis. *Neuroscience* 277, 132–138. <https://doi.org/10.1016/j.neuroscience.2014.03.047>.
31. Ryu, H., Smith, K., Camelo, S.I., Carreras, I., Lee, J., Iglesias, A.H., Danguond, F., Cormier, K.A., Cudkowicz, M.E., Brown, R.H., Jr., and Ferrante, R.J. (2005). Sodium phenylbutyrate prolongs survival and regulates expression of anti-apoptotic genes in transgenic amyotrophic lateral sclerosis mice. *J. Neurochem.* 93, 1087–1098. <https://doi.org/10.1111/j.1471-4159.2005.03077.x>.
32. Petri, S., Kiaei, M., Kipiani, K., Chen, J., Calingasan, N.Y., Crow, J.P., and Beal, M.F. (2006). Additive neuroprotective effects of a histone deacetylase inhibitor and a catalytic antioxidant in a transgenic mouse model of amyotrophic lateral sclerosis. *Neurobiol. Dis.* 22, 40–49. <https://doi.org/10.1016/j.nbd.2005.09.013>.
33. Henriques, A., Pitzer, C., and Schneider, A. (2010). Characterization of a novel SOD-1(G93A) transgenic mouse line with very decelerated disease development. *PLoS One* 5, e15445. <https://doi.org/10.1371/journal.pone.0015445>.
34. Pitzer, C., Krüger, C., Plaas, C., Kirsch, F., Dittgen, T., Müller, R., Laage, R., Kastner, S., Suess, S., Spoelgen, R., et al. (2008). Granulocyte-colony stimulating factor improves outcome in a mouse model of amyotrophic lateral sclerosis. *Brain* 131, 3335–3347. <https://doi.org/10.1093/brain/awn243>.
35. Kiernan, M.C., Vucic, S., Talbot, K., McDermott, C.J., Hardiman, O., Shefner, J.M., Al-Chalabi, A., Huynh, W., Cudkowicz, M., Talman, P., et al. (2021). Improving clinical trial outcomes in amyotrophic lateral sclerosis. *Nat. Rev. Neurol.* 17, 104–118. <https://doi.org/10.1038/s41582-020-00434-z>.
36. Dreger, M., Steinbach, R., Otto, M., Turner, M.R., and Grosskreutz, J. (2022). Cerebrospinal fluid biomarkers of disease activity and progression in amyotrophic lateral sclerosis. *J. Neurol. Neurosurg. Psychiatry* 93, 422–435. <https://doi.org/10.1136/jnnp-2021-327503>.
37. Bauersachs, H.G., Bengtson, C.P., Weiss, U., Hellwig, A., García-Vilela, C., Zaremba, B., Kaessmann, H., Pruunsild, P., and Bading, H. (2022). N-methyl-D-aspartate Receptor-mediated Preconditioning Mitigates Excitotoxicity in Human Induced Pluripotent Stem Cell-derived Brain Organoids. *Neuroscience* 484, 83–97. <https://doi.org/10.1016/j.neuroscience.2021.12.026>.
38. Johnson, S.A., Fang, T., De Marchi, F., Neel, D., Van Weehaeghe, D., Berry, J.D., and Paganoni, S. (2022). Pharmacotherapy for Amyotrophic Lateral Sclerosis: A Review of Approved and Upcoming Agents. *Drugs* 82, 1367–1388. <https://doi.org/10.1007/s40265-022-01769-1>.
39. Rinaldi, C., and Wood, M.J.A. (2018). Antisense oligonucleotides: the next frontier for treatment of neurological disorders. *Nat. Rev. Neurol.* 14, 9–21. <https://doi.org/10.1038/nrneuro.2017.148>.
40. Miller, T., Cudkowicz, M., Shaw, P.J., Andersen, P.M., Atassi, N., Bucelli, R.C., Genge, A., Glass, J., Ladha, S., Ludolph, A.L., et al. (2020). Phase 1-2 Trial of Antisense Oligonucleotide Tofersen for SOD1 ALS. *N. Engl. J. Med.* 383, 109–119. <https://doi.org/10.1056/NEJMoa2003715>.
41. Lagier-Tourenne, C., Baughn, M., Rigo, F., Sun, S., Liu, P., Li, H.R., Jiang, J., Watt, A.T., Chun, S., Katz, M., et al. (2013). Targeted degradation of sense and antisense C9orf72 RNA foci as therapy for ALS and frontotemporal degeneration. *Proc. Natl. Acad. Sci. USA* 110, E4530–E4539. <https://doi.org/10.1073/pnas.1318835110>.
42. Jiang, J., Zhu, Q., Gendron, T.F., Saberi, S., McAlonis-Downes, M., Seelman, A., Stauffer, J.E., Jafar-Nejad, P., Drenner, K., Schulte, D., et al. (2016). Gain of Toxicity from ALS/FTD-Linked Repeat Expansions in C9ORF72 Is Alleviated by Antisense Oligonucleotides Targeting GGGGCC-Containing RNAs. *Neuron* 90, 535–550. <https://doi.org/10.1016/j.neuron.2016.04.006>.
43. Zhang, S.J., Steijaert, M.N., Lau, D., Schütz, G., Delucinge-Vivier, C., Descombes, P., and Bading, H. (2007). Decoding NMDA receptor signaling: identification of genomic programs specifying neuronal survival and death. *Neuron* 53, 549–562. <https://doi.org/10.1016/j.neuron.2007.01.025>.
44. Bading, H., and Greenberg, M.E. (1991). Stimulation of protein tyrosine phosphorylation by NMDA receptor activation. *Science* 253, 912–914. <https://doi.org/10.1126/science.1715095>.

45. Pruunsild, P., Bengtson, C.P., and Bading, H. (2017). Networks of Cultured iPSC-Derived Neurons Reveal the Human Synaptic Activity-Regulated Adaptive Gene Program. *Cell Rep.* 18, 122–135. <https://doi.org/10.1016/j.celrep.2016.12.018>.
46. Sugimoto, K., Liu, J., Li, M., Song, Y., Zhang, C., Zhai, Z., and Gao, Y. (2021). Neuroprotective Effects of Shenqi Fuzheng Injection in a Transgenic SOD1-G93A Mouse Model of Amyotrophic Lateral Sclerosis. *Front. Pharmacol.* 12, 701886. <https://doi.org/10.3389/fphar.2021.701886>.

## STAR★METHODS

### KEY RESOURCES TABLE

| REAGENT or RESOURCE                                  | SOURCE                            | IDENTIFIER                          |
|------------------------------------------------------|-----------------------------------|-------------------------------------|
| <b>Antibodies</b>                                    |                                   |                                     |
| Mouse monoclonal anti-EAAT2                          | Proteintech                       | Cat#ABN90;<br>RRID: AB_2882391      |
| Goat polyclonal anti-ChAT                            | Millipore                         | Cat#AB144P;<br>RRID: AB_2079151     |
| Goat polyclonal anti-Iba1                            | Abcam                             | Cat#Ab5076;<br>RRID: AB_2224402     |
| Rabbit monoclonal anti-GAPDH                         | Cell Signaling Technology         | Cat#2118;<br>RRID: AB_561053        |
| Rabbit polyclonal anti-TRPM4                         | Millipore                         | Cat#ABN418;<br>RRID: AB_2891307     |
| Rabbit polyclonal anti-TRPM4                         | Yan et al. <sup>20</sup>          | N/A                                 |
| Rabbit polyclonal anti-GluN1                         | Abcam                             | Cat#Ab17345;<br>RRID: AB_776808     |
| Rabbit polyclonal anti-GluN2A                        | Millipore                         | Cat#AB1555;<br>RRID: AB_2112325     |
| Rabbit polyclonal anti-GluN2B                        | Novus                             | Cat#NB300-106;<br>RRID: AB_10000537 |
| Rabbit polyclonal anti-Myt1L                         | Dr. Moritz Mall, DKFZ, Heidelberg | N/A                                 |
| Mouse monoclonal anti-NeuN                           | Biologend                         | Cat#834501;<br>RRID: AB_2564991     |
| Mouse monoclonal anti-GFAP                           | Cell Signaling Technology         | Cat#3670S;<br>RRID: AB_561049       |
| <b>Bacterial and virus strains</b>                   |                                   |                                     |
| pAdDeltaF6                                           | Zhang et al. <sup>43</sup>        | Addgene#112867                      |
| pRV1                                                 | Zhang et al. <sup>43</sup>        | N/A                                 |
| pH21                                                 | Zhang et al. <sup>43</sup>        | N/A                                 |
| pAAV-hSyn-mCherry.NLS                                | This paper                        | N/A                                 |
| <b>Chemicals, peptides, and recombinant proteins</b> |                                   |                                     |
| Neurobasal™-A Medium                                 | Gibco™                            | Cat#10888022                        |
| B-27™ Supplement (50x), serum-free                   | Gibco™                            | Cat#17504044                        |
| GlutaMAX™ Supplement                                 | Gibco™                            | Cat#35050038                        |
| Penicillin-Streptomycin                              | Gibco™                            | Cat#15070063                        |
| Opti-MEM                                             | Gibco™                            | Cat#31985047                        |
| Rat serum                                            | Biowest                           | Cat#S2150                           |
| Glutamate                                            | Tocris                            | Cat#0218                            |
| Na <sub>2</sub> SO <sub>4</sub>                      | Sigma Aldrich                     | Cat#S5640                           |
| K <sub>2</sub> SO <sub>4</sub>                       | Sigma Aldrich                     | Cat#P8541                           |
| CaCl <sub>2</sub>                                    | Sigma Aldrich                     | Cat#C7902                           |
| MgCl <sub>2</sub>                                    | Sigma Aldrich                     | Cat#M2393                           |
| Kynurenic acid                                       | Sigma Aldrich                     | Cat#K3375                           |
| Papain latex                                         | Cell Systems                      | Cat#LS003127                        |
| Poly-D-lysine hydrobromide                           | Sigma Aldrich                     | Cat#P7886                           |
| Laminin                                              | Sigma Aldrich                     | Cat#L2020                           |
| Trypsin inhibitor                                    | Sigma Aldrich                     | Cat#T9253                           |
| NMDA                                                 | Tocris                            | Cat#0114                            |

(Continued on next page)

**Continued**

| REAGENT or RESOURCE                              | SOURCE                | IDENTIFIER                    |
|--------------------------------------------------|-----------------------|-------------------------------|
| Tris base                                        | Merck                 | Cat#T1503                     |
| NaCl                                             | Merck                 | Cat# S167                     |
| EDTA                                             | AppliChem             | Cat#A3553                     |
| Triton X-100                                     | Merck                 | Cat#108603<br>CAS:9036-19-5   |
| Glycerol                                         | VWR                   | Cat#24387.292<br>CAS:56-81-5  |
| Pierce™ BCA Protein Assay Kits                   | Thermo Scientific™    | Cat#23225                     |
| cOmplete™, EDTA-free Protease Inhibitor Cocktail | Roche                 | Cat#11873580001               |
| Pierce™ Protein A/G Magnetic Beads               | Thermo Scientific™    | Cat#88803                     |
| Paraformaldehyde                                 | Merck                 | Cat#158127                    |
| Corning Matrigel Matrix                          | Corning               | Cat#356255                    |
| DMEM/F12                                         | Thermo Scientific™    | Cat#31330038                  |
| mTeSR™ Plus                                      | STEMCELL Technologies | Cat#100-0276                  |
| Normocin                                         | Invivogen             | Cat#ant-nr-1                  |
| N-2 Supplement                                   | Thermo Scientific™    | Cat#17502048                  |
| Dispase                                          | STEMCELL Technologies | Cat#07923                     |
| Accutase                                         | STEMCELL Technologies | Cat#07920                     |
| B27 without Vitamin A                            | Thermo Scientific™    | Cat#12587010                  |
| Dorsomorphin                                     | Tocris                | Cat#3093<br>CAS:1219168-18-9  |
| Recombinant Noggin                               | R&D Systems           | Cat#719-NG                    |
| SB431542                                         | Tocris                | Cat#1614<br>CAS:301836-41-9   |
| β-Mercaptoethanol                                | Thermo Scientific™    | Cat#21985023<br>CAS:60-20-4   |
| IWP-2                                            | Sigma Aldrich         | Cat#681671<br>CAS:686770-61-6 |
| Cyclopamine                                      | Tocris                | Cat#3093<br>CAS:1219168-18-9  |
| Recombinant human EGF                            | Thermo Scientific™    | Cat#PHG0311L                  |
| Recombinant human FGF-basic                      | Peptotech             | Cat#100-18B                   |
| Recombinant human BDNF                           | Peptotech             | Cat#450-02                    |
| Recombinant human NT-3                           | Peptotech             | Cat#450-03                    |
| BrainPhys™ Neuronal Medium                       | STEMCELL Technologies | Cat#05790                     |
| FP802                                            | Wuxi AppTec/Chemspace | CAS:61694-81-3                |
| Propylene Glycol                                 | Sigma Aldrich         | Cat#P4347<br>CAS:57-55-6      |
| Hoechst 33258                                    | Sigma Aldrich         | Cat#14530<br>CAS:23491-45-4   |
| Mowiol 4-88                                      | Sigma Aldrich         | Cat#475904<br>CAS:9002-89-5   |

**Critical commercial assays**

|                                        |                                                    |                                          |
|----------------------------------------|----------------------------------------------------|------------------------------------------|
| Automated Patch Clamp                  | Charles River Laboratories, UK                     | Custom-made, Yan et al.<br><sup>20</sup> |
| Pharmacology safety screening of FP802 | Eurofins Panlabs Discovery<br>Services Taiwan, Ltd | Assay ID in <a href="#">Table S1</a>     |
| Hematology and Clinical Chemistry      | IDEXX Laboratories, DE                             | Assay ID in <a href="#">Table S2/3</a>   |

(Continued on next page)

**Continued**

| REAGENT or RESOURCE                                                                               | SOURCE                          | IDENTIFIER                        |
|---------------------------------------------------------------------------------------------------|---------------------------------|-----------------------------------|
| Neurofilament light chain measurement with Simoa® NF-light™ Advantage Kit (Quanterix Cat #103186) | PBL Assay Science, US           | N/A                               |
| <b>Experimental models: Cell lines</b>                                                            |                                 |                                   |
| HEK293 cells                                                                                      | Stratagene                      | Cat#240073<br>RRID:DVDL_6871      |
| Healthy control – 1, iPSC                                                                         | Bauersachs et al. <sup>37</sup> | D1, Dr. Utikal, DKFZ, Heidelberg  |
| Healthy control – 2, iPSC                                                                         | Bauersachs et al. <sup>37</sup> | HD6, Dr. Utikal, DKFZ, Heidelberg |
| Sporadic ALS, iPSC                                                                                | Cedars-Sinai                    | CS2XWCiALS-nxx                    |
| SOD1 <sup>G93A</sup> ALS, iPSC                                                                    | Cedars-Sinai                    | CS2RJViALS-nxx                    |
| <b>Experimental models: Organisms/strains</b>                                                     |                                 |                                   |
| C57/Bl6, for primary cortical cultures                                                            | CRL                             | N/A                               |
| SOD1 <sup>G93A</sup> transgenic mice                                                              | Jackson Laboratory              | Line#004435                       |
| <b>Oligonucleotides</b>                                                                           |                                 |                                   |
| Atf3                                                                                              | Taqman                          | Mm00476032_m1                     |
| Arc                                                                                               | Taqman                          | Mm00479619_g1                     |
| Bdnf                                                                                              | Taqman                          | Mm00432069_m1                     |
| cFos                                                                                              | Taqman                          | Mm00487425_m1                     |
| Inhibin beta A                                                                                    | Taqman                          | Mm00434338_m1                     |
| Npas4                                                                                             | Taqman                          | Mm00463644_m1                     |
| <b>Software and algorithms</b>                                                                    |                                 |                                   |
| Sygnis tracking software for Open Field analysis                                                  | INBC, DE                        | N/A                               |
| GraphPad Prism                                                                                    | N/A                             | RRID:SCR_002798                   |
| SAS                                                                                               | N/A                             | RRID: SCR_008567                  |
| ImageJ                                                                                            | N/A                             | RRID:SCR_003070                   |

**RESOURCE AVAILABILITY**

**Lead contact**

Further information and requests for resources and reagents should be directed to and will be fulfilled by the lead contact, Hilmar Bading ([Bading@nbio.uni-heidelberg.de](mailto:Bading@nbio.uni-heidelberg.de)).

**Materials availability**

This study did not generate new unique reagents except for FP802.

FP802 generated in this study will be made available on request, but we may require a payment and/or a completed Materials Transfer Agreement if there is potential for commercial application.

**Data and code availability**

- (1) All data reported in this paper will be shared by the lead contact upon request.
- (2) This paper does not report original code.
- (3) Any additional information required to reanalyze the data reported in this paper is available from the lead contact upon request.

**EXPERIMENTAL MODEL AND STUDY PARTICIPANT DETAILS**

**Animals**

Heterozygous SOD1<sup>G93A</sup> transgenic mice expressing human SOD1<sup>G93A</sup> mutant on a C57BL/6 background (Jackson Laboratory, 004435, RRID:IMSR\_JAX:004435) were used in this study.<sup>24,34</sup> Heterozygosity was maintained by mating heterozygous transgenic males with C57BL/6 wild-type females. The animals were provided by the interdisciplinary neurobehavioral core (INBC) at Heidelberg University. Only male wild-type mice and male transgenic mice were used in the experiments. They were housed in groups (maximally three mice/cage) in the INBC, where all behavior experiments were performed. All mice were kept in standard cages (15 cm × 21 cm × 13.5 cm) on a 12:12 h light:dark cycle with *ad libitum* access to food, water, and nesting material. The treatments were randomly allocated to mice within litter blocks. The experimenter was blinded to the experimental group from the implantation until all analyses were done.

A total of 83 heterozygous SOD1<sup>G93A</sup> and 22 wild-type littermates were employed in this study. Eight WT and 12 SOD1<sup>G93A</sup> mice were used to determine the EAAT2 protein levels in the spinal cord. Three SOD1<sup>G93A</sup> mice were treated with FP802 to explore the concentration of FP802 in the spinal cord. Four SOD1<sup>G93A</sup> mice were used to test the tolerability of mice to subcutaneously ALZET osmotic pump (type 2004) implantation with FP802 that allowed a continuous and constant supply of compound to the animals for 4 weeks. Eight wild-type mice were used to explore the disruption of the NMDAR/TRPM4 death signaling complex by FP802. In total, 52 SOD1<sup>G93A</sup> mice were treated with FP802 or vehicle via ALZET osmotic pump from week 15 for 30 days (four cohorts). It was not possible to extend the treatment beyond the 30 days application period because the poor health state of many animals was incompatible with the anesthesia required for surgical implantation of a second osmotic pump. The number of animals used for experiments was specified in the figure legends. One animal was excluded from the lifespan analysis because it showed an abnormally delayed disease onset and prolonged survival.<sup>33</sup> In addition, six wild-type littermates and 12 SOD1<sup>G93A</sup> mice were used at week 19 and week 15, respectively, for the analysis of motor neuron survival and serum NFL levels. For the analysis of motor neuron survival, three mice (two from wild-type littermates, one from vehicle-treated SOD1<sup>G93A</sup> mice) were excluded from the motor neuron survival because of the loss of sample during preparation.

All animal procedures were carried out according to the German guidelines for the care and use of laboratory animals and in accord with the European Community Council Directive 2010/63/EU. This study was approved by the animal care and use committee, Regierungspräsident Karlsruhe, Referat 35, Germany, AZ 35.9185.81/G-190/19. The authors declare that all experiments conformed to all relevant local regulatory standards.

### Primary neuronal cultures

Primary mouse cortical neurons were prepared as previously described.<sup>43,44</sup> Briefly, brain cortices from neonatal mice (C57/Bl6, RRID:MG1:7264769) were removed and cut into small pieces in the dissociation medium (in mM: 81.8 Na<sub>2</sub>SO<sub>4</sub>, 30 K<sub>2</sub>SO<sub>4</sub>, 15.85 MgCl<sub>2</sub>, 0.25 CaCl<sub>2</sub>, 1.0 HEPES, 1050.0 kynurenic acid; 0.2% phenol red and 0.36% glucose). The tissues were then digested with papain latex (10 units/mL) in the dissociation medium supplemented with 0.45 mg/mL L-cysteine for two times of 15 min in a 37°C water bath with stirring at 15 rpm. Then the tissue was washed twice with the dissociation medium and incubated with trypsin inhibitor (0.01 g/mL) in dissociation medium for 3 × 5 min. The samples were then triturated into single cell solution and plated at a density of 0.25 × 10<sup>6</sup> cell per well in 24-well plates, which have been pretreated with poly-D-lysine (26.7 mg/μL) and laminin (6.7 mg/μL). Neurons were maintained in neurobasal-A medium supplemented with 1% rat serum, 1 × B27 supplement, 1 × L-GlutaMAX, and 1 × penicillin/streptomycin at 37°C, 5% CO<sub>2</sub> and 95% humidity. On day *in vitro* (DIV) 3, 2.8 μM cytosine beta-D-arabinofuranoside hydrochloride was added to the cultures to stop proliferation of non-neuronal cells. Primary neurons plated in 24 well plates were infected with 0.25 × 10<sup>9</sup> rAAV-hSyn-mCherry-NLS viral particles on DIV3. Half medium change was done with medium without rat serum every two to three days starting on DIV8.

### HEK293 cells

HEK293 cells were cultured with high glucose DMEM supplemented with 10% FBS, 1 × penicillin and streptomycin, 1 × non-essential amino acids, and 1 × sodium pyruvate at 37°C, 5% CO<sub>2</sub>, and 95% humidity.

### Human iPSC-derived forebrain organoids

The generation of human iPSC-derived forebrain organoids was carried out in accordance with the regulations of Heidelberg University. The sporadic ALS iPSC line and the SOD1<sup>G94A</sup> ALS iPSC line were purchased from Cedars-Sinai (CS2XWCiALS-nxx and CS2RJViALS-nxx). The healthy control iPSC lines were from Dr. Jochen Utikal (DKFZ, Germany). Forebrain organoids were generated and maintained as described previously.<sup>37,45</sup> Briefly, hiPSCs were dissociated into single cells by Accutase and aggregated in round bottom 96-microwell plates with 5 min centrifugation at 600 rpm. On the second day, hiPSC aggregates were collected and transferred into low attachment 35 mm dishes (24 aggregates/dish) and kept in neural induction medium (DMEM/F12 medium supplemented with 1 × penicillin/streptomycin, 1 × Normocin, 1 × GlutaMAX, 1 × N-2 supplement, 2 × B27 without vitamin A, 500 nM dorsomorphin, 50 ng/mL recombinant human noggin, 10 μM SB431542, 2 μM IWP-2, 1 μM cyclopamine, and 0.1% β-mercaptoethanol) for 3 days with a daily medium change. Recombinant human FGF (10 ng/mL) was present in neural induction medium from day 4 to day 7 with one medium change on day 5.5. On day 7, neural induction medium was changed to proliferation medium (neurobasal medium supplemented with 1 × GlutaMAX, 1 × penicillin/streptomycin, 1 × Normocin, 1 × B27 without vitamin A, 10 ng/mL recombinant human FGF, 10 ng/mL recombinant human EGF, 2 μM IWP-2, and 1 μM cyclopamine) for two weeks with medium change every 2–3 days. In week 4–5, the proliferation medium was changed to differentiation medium (neurobasal medium supplemented with 1 × GlutaMAX, 1 × penicillin/streptomycin, 1 × Normocin, 10 ng/mL recombinant human BDNF, and 10 ng/mL recombinant human NT-3) with medium change every 2–3 days. From week 6, the organoids were kept in the maturation medium (BrainPhys medium supplemented with 1 × GlutaMAX, 1 × penicillin/streptomycin, 1 × Normocin) until week 18–20 when they were used for experiments.

## METHOD DETAILS

### Synthesis of FP802

FP802 was synthesized in three steps. Chemicals are given as smiles. First,  $\text{ClC1=CC(C=O)=CC=C1}$  is added to  $\text{NCCNC(OC(C)(C)C)=O}$  in presence of sodium cyanoborohydride and methanol to generate  $\text{ClC1=CC(CNCCNC(OC(C)(C)C)=O)=CC=C1}$ . Second, the ethyl group is added with 10 eq acetaldehyde in the presence of sodium cyanoborohydride and methanol at 25°C to generate  $\text{ClC1=CC(CN(CC)CCNC(OC(C)(C)C)=O)=CC=C1}$ . Third, the protective tert-butyloxycarbonyl (Boc) is removed by HCl and ethyl acetate to generate FP802 ( $\text{ClC1=CC(CN(CC)CCN)=CC=C1}$ ) in a salt format with 2 HCl. Mass spectrometry revealed purity of FP802 > 99.5%.

### Glutamate neurotoxicity assay in primary cortical neurons

On DIV10, vehicle (DMSO) or FP802 were added to the primary cortical cultures 30 min prior to glutamate insult. Images were acquired following the glutamate application for 24 h with 2 h intervals, where 9 images were obtained via a 20x objective for each condition at each time point with InCuCyte S3 Live-Cell Analysis System (Sartorius AG, Germany). Survival of neuronal cells (%) was quantified by analyzing the number of mCherry-positive nuclei with the Basic Analyzer of the InCuCyte 2021 software using size (50–150  $\mu\text{m}^2$ ) and average intensity (>10) as selection criteria.

### Recombinant adeno-associated virus (rAAV) and expression vectors

2–3 h before the transfection, the culture medium was changed to IMEM supplemented with 5% FBS. Then the HEK293 cells were transfected using pAdDeltaF6, pRV1, pH21, and pAAV-hSyn-mCherry-NLS (molar ratios: 2:0.75:0.75:1); for each 15 cm dish, 25  $\mu\text{g}$  plasmids in total were used and a calcium phosphate-based transfection medium (25 mM HEPES, 140 mM NaCl, 1.5 mM  $\text{Na}_2\text{HPO}_4$ , and 165 mM  $\text{CaCl}_2$ ). 16 h after transfection, the medium was changed to normal culture medium and cells were washed and harvested in phosphate-buffered saline (PBS). The rAAV containing HEK293 cell pellets were resuspended with 150 mM NaCl/10 mM Tris (pH 8.5) with 0.5% sodium deoxycholate and 50 units/ml Benzonase at 37°C for 1 h. The rAAV particles were purified via heparin columns. Briefly, the heparin column was pre-washed with 10 mL 150 mM NaCl/10 mM Tris before loading with 50 mL HEK293 cell lysate containing rAAV particles, then the column was washed with 1 mL of 200 mM NaCl/10 mM Tris and 300 mM NaCl/10 mM Tris to get rid of unspecific binding. The rAAV particles were collected in 1.5 mL 400 mM NaCl/10 mM Tris, 3.0 mL 450 mM NaCl/10 mM Tris, and 1.5 mL 500 mM NaCl/10 mM Tris, sequentially. Finally, the rAAV particles were concentrated with Amicon Ultra-4 centrifugal filter devices 100K NMWL, sterile filtered (0.22  $\mu\text{m}$ ), and stored in PBS at 4°C. The titer of rAAV particles (genome copies/ml) was determined with quantitative real-time PCR with primers designed to woodchuck hepatitis virus post-translational regulatory element (WPRE) as described previously<sup>43</sup>

### Immunoprecipitation and immunoblot analysis

All procedures for immunoprecipitation were carried out at 4°C as described before.<sup>20</sup> Lumbar spinal cords were dissected from mice two weeks after ALZET osmotic pump (1002) implantation. Tissues were homogenized and lysed in immunoprecipitation buffer (10 mM Tris, pH 8.0, 150 mM NaCl, 1 mM EDTA, 1% Triton X-100, 10% glycerol) containing EDTA-free protease inhibitor cocktail (Roche) for 60 min. The lysate was centrifuged for 10 min at 1200 × g to remove cell debris and nuclei and then pre-cleared with anti-rabbit-IgG and protein A/G magnetic beads (Pierce). Protein concentrations of the supernatants were measured using the Pierce BCA Protein Assay Kit. Supernatant with 1500  $\mu\text{g}$  proteins was then mixed with anti-TRPM4 antibody for 3 h and protein A/G magnetic beads overnight, followed by 3 washes with immunoprecipitation buffer. The precipitates were subsequently boiled in 2x Laemmli buffer and kept at –20°C until use. All other samples were harvested in the immunoprecipitation buffer with protease inhibitor cocktail and 30  $\mu\text{g}$  protein were loaded into each lane for immunoblot analysis.

### Assessment of disease progression in SOD1<sup>G93A</sup> mice

Bodyweight and neurological scores were examined weekly starting at the onset of symptoms at week 15, which has been defined by previous studies with the same mouse line.<sup>33,34</sup> Neurological scores of the mice were recorded as 0–4 based on the behavior of their hind limbs.<sup>46</sup> The humane endpoint was defined as the mouse's inability to rectify itself in 30 s and examined daily from week 19 without knowing the treatment group.

### Open field test for SOD1<sup>G93A</sup> mice

Before experiments, mice were habituated to the experimenter and testing room by gentle handling for 1 min in 3 consecutive days. A brief video was taken in the behavior room where the SOD1<sup>G93A</sup> mice were placed in an open chamber. On the experimental day, the mice were placed into an open arena (50 cm × 50 cm × 50 cm) for a total of 10 min experiment. The total traveled distance of each mouse was traced and analyzed with SYGNIS software, and also the rearing time was reordered without knowledge of the treatment.

### Immunohistochemistry

The survival of motor neurons was examined by quantifying the motor neuron marker, choline acetyltransferase (ChAT)-positive neurons, and the inflammation was examined by quantifying the microglial cell marker, ionized calcium binding adaptor molecule 1 (Iba1), in the ventral horn of lumbar spinal cord (L3–L5). All control mice and SOD1 mice were perfused with 20 mL PBS followed

by 20 mL of 4% paraformaldehyde in PBS. The lumbar spinal cord was dissected and post-fixed in the same solution for an additional 10 min, followed by 24 h incubation with 30% sucrose solution in PBS. Then the spinal cords were snap frozen on dry ice in cryoprotectant solution and 30  $\mu\text{m}$  cryosections were prepared for staining. Floating slices were blocked and permeabilized with the blocking solution (5% donkey serum, 3% bovine serum albumin (BSA), and 0.3% Triton X-100 in PBS) for 1 h and then incubated with either anti-ChAT (1:300) or anti-Iba1 (1:300) antibodies in blocking buffer for 24 h at 4°C. The slices were washed with 1% Triton X-100 in PBS and stained with corresponding secondary antibodies. Images were obtained using EVOS M7000 Imaging System equipped with a 10x objective. For analysis, ChAT-positive cells were manually labeled with ImageJ in 10 ventral horns (5 sections) from the L3-L5 region of each animal. The areas for all ChAT-positive cells were calculated and shown as size distribution, and only areas  $>300 \mu\text{m}^2$  (diameter  $>10 \mu\text{m}$ ) were used for motor neuron quantification. Iba1-positive cells were counted manually in at least 6 randomly selected blocks ( $100 \mu\text{m}^2$ ) from 3 ventral horns per mice and shown as numbers per  $100 \mu\text{m}^2$  per animal. Data analysis was performed without knowledge of treatment.

The analysis of forebrain organoid cell types that undergo NMDA-induced cell death was done using immunostainings of cryosections of 20-week-old forebrain organoids with antibodies against the neuronal markers, NeuN and Myelin transcription factor 1 like (Myt1L) protein, and the astrocyte marker, glial fibrillary acidic protein (GFAP) using the following procedure. All organoids were washed with PBS twice and fixed using 4% paraformaldehyde in PBS for 30 min, followed by 24 h incubation with 30% sucrose solution in PBS. Organoids were snap frozen on dry ice in cryoprotectants and 30  $\mu\text{m}$  cryosections were prepared for staining. Slices were blocked with 3% BSA and 0.3% Triton X-100 in PBS for 1 h and then incubated with either anti-NeuN (1:200), anti-Myt1L (1:1000), or anti-GFAP (1:400) antibodies in the blocking buffer for 12 h at 4°C. Slices were washed with 0.3% Triton X-100 in PBS, stained with the corresponding secondary antibodies, and mounted in Mowiol 4–88 solution containing Hoechst 33258. Images were obtained using a Yokogawa CQ1 confocal microscope with a 10x objective, and z series sum projections were produced from a depth of 20  $\mu\text{m}$  with 2.0  $\mu\text{m}$  intervals. Images were stitched with the CellPathfinder software from Yokogawa. Cells stained with NeuN, Myt1L, and Hoechst were automatically counted with ImageJ with the particle analyzer with a self-developed macro using the Binary-Watershed function, size exclusion was set at  $60 \mu\text{m}^2$ . NeuN-positive and Myt1L-positive post-mitotic neurons were counted in confocal section z-stacks of whole organoids (5–8 organoids from 2 batches) with ImageJ with the particle analyzer with a self-developed macro using the Binary-Watershed function, size exclusion was set at  $60 \mu\text{m}^2$  and expressed as a percentage of total Hoechst-stained nuclei. GFAP staining was quantified by measuring the fluorescent signals of z-stacks of confocal sections of whole organoids (5–6 organoids from 2 batches) using ImageJ and expressed as arbitrary units. Data analysis was performed without knowledge of treatment.

### Hematology, clinical chemistry and neurofilament light chain

All hematology and most serum clinical chemistry analyses were carried out by IDEXX Laboratories, Germany. The neurofilament light chain levels in serum were determined by PBL Assay Science (USA) using the Simoa NF-light Advantage Kit (Quanterix Cat #103186).

### Pharmacology safety screening of FP802

Pharmacology safety of FP802 was evaluated in radio ligand binding assays carried out by Eurofins Panlabs Discovery Services Taiwan, Ltd. Significant responses are defined as over 50% inhibition or stimulation in the primary assays. No significant results were noted with FP802.

### Automated patch clamp

Recombinant human GluN1 (UniProt ID Q05586) with GluN2A (UniProt Q12879) or GluN2B (UniProt Q13224) NMDARs were stably expressed under tetracycline control in HEK293 cell lines (Charles River). Voltage-clamp recordings were performed using the Sophion Qube platform which performs 384 parallel and independent patch-clamp recordings with digitally controlled microfluidics (Tecan D300) on a disposable single-hole or multi-hole QChip. The following extracellular solution was used: 145 mM NaCl, 4 mM KCl, 10 mM HEPES, 10 mM glucose, 2 mM  $\text{CaCl}_2$ , 1 mM  $\text{MgCl}_2$ ; pH 7.4. The following intracellular solution was used: 70 mM CsF, 70 mM CsCl, 10 mM HEPES, 1 mM EGTA; 316 mOsm, pH 7.2. For analysis of channel activation kinetics, cells were held at  $-70 \text{ mV}$  and stepped to  $-20 \text{ mV}$  before the application of glycine (100  $\mu\text{M}$ ) plus NMDA (90  $\mu\text{M}$  for GluN1/GluN2A and 40  $\mu\text{M}$  for GluN1/GluN2B). These concentrations represent saturating glycine and  $\text{EC}_{80}$  NMDA concentrations for glutamate receptor activation as determined previously for each cell line. Quality control thresholds were set according to the seal resistance (minimum 20  $\text{m}\Omega$ ), and failed experiments were excluded from the analysis. For analysis of steady state agonist  $\text{IC}_{50}$  values, voltage steps to  $+40 \text{ mV}$  were performed in the presence and absence of agonists before and after compound application in the same cell.  $\text{IC}_{50}$  data were generated from agonist responses as described before.<sup>20</sup>

### NMDA-induced neurotoxicity in human iPSC-derived organoids

The NMDA-induced neurotoxicity assay was carried out with 18–20 week-old organoids and measured in 96-microwell plates with the RealTime-Glo MT Cell Viability Assay (Promega, G9711) on a plate reader set at 5%  $\text{CO}_2$  at 37°C. The MT Cell Viability Substrate can diffuse into cells and only metabolically active cells can reduce the substrate and produce luminescence which is proportional to the live cells in an organoid. Before the toxic stimulation, the organoid was incubated with NanoLuc Enzyme and MT Cell Viability Substrate for 30 min to collect the basal luminescence signal. After NMDA stimulation (0 h), the plate was put in the plate reader and the luminescence signal was collected every 0.5 h for 24 h. The luminescence of each time point  $F_{ij}$  was normalized to the basal



signal for every single organoid as fold increase, where it reflects the cell viability. The area under the curve (AUC) of  $F(t)$  over a 24 h period was shown as  $AUC_{0-24h}$ , and also the viability of organoid cells, which is based on the following equation:

$$\text{Viability of organoid cells (\%)} = \frac{AUC_{0-24h}}{AUC_{\text{control}, 0-24h}} \times 100\%$$

Where  $AUC_{\text{control}, 0-24h}$  stands for the data from organoids without any compound or NMDA insult.

### QUANTIFICATION AND STATISTICAL ANALYSIS

All statistical analyses were performed using GraphPad Prism (RRID: SCR\_002798). The statistical details of each experiment can be found in the figure legends, including the statistical tests used, exact value of  $n$ , what  $n$  represents, definition of center, and dispersion and precision measures. The significance was defined as  $p < 0.05$  in selected statistical methods. For unpaired  $t$  test, we used F test to examine the Gaussian distribution; to determine if the  $p$  value of the F test is significant, Mann-Whiney test was performed. For one- and two-way ANOVA, we used the Brown-Forsythe test to examine the SD; if the  $p$  value of the Brown-Forsythe was significant, Brown-Forsythe and Welch ANOVA tests were used. Exclusion of subjects was clearly indicated in the section of method details. Biostatistical and biometrical planning was guided and reviewed by the Department of Medical Biometry and Informatics at Heidelberg University. *A priori* power calculations of animal numbers were carried out. Sample sizes were calculated using SAS version 9.1 (Statistical Analysis System, RRID: SCR\_008567) pro-power to ensure adequate power of key experiments in detecting pre-specified effect sizes.

**Cell Reports Medicine, Volume 5**

**Supplemental information**

**TwinF interface inhibitor FP802 stops loss  
of motor neurons and mitigates disease  
progression in a mouse model of ALS**

**Jing Yan, Yu Meng Wang, Andrea Hellwig, and Hilmar Bading**

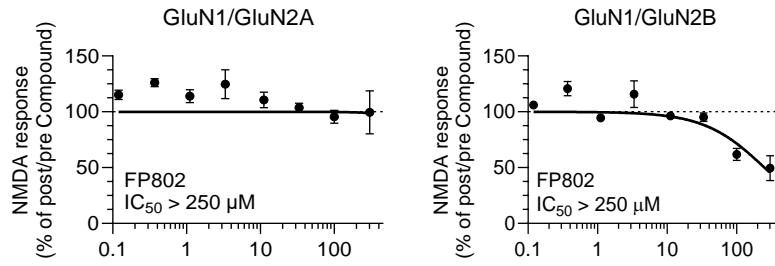

**Figure S1. Analysis of IC<sub>50</sub> values of FP802 for NMDARs in HEK293 cells.** Voltage clamp recordings were performed using the Sophion Qube platform to assess the activation levels of human GluN1/GluN2A or GluN1/GluN2B NMDARs in the presence of FP802. The effects of FP802 on NMDARs were evaluated at +40 mV for eight concentrations (in μM: 0.14, 0.42, 1.2, 3.7, 11.1, 33.3, 100, and 300) in stable HEK293 cell lines expressing human GluN1/GluN2A or GluN1/GluN2B NMDARs. NMDA responses are plotted as the ratio of post/pre compound application and further normalized to 0.3% DMSO as vehicle. IC<sub>50</sub> estimates were generated from logistic fits of the Hill equation to dose-response relationships. D-APV was used as a control with an IC<sub>50</sub> value of 4.5 μM and 4.3 μM for GluN1/GluN2A and GluN1/GluN2B, respectively. Data represent mean ± SEM, n = 3-7 from two independent experiments. Related to Figure 1.

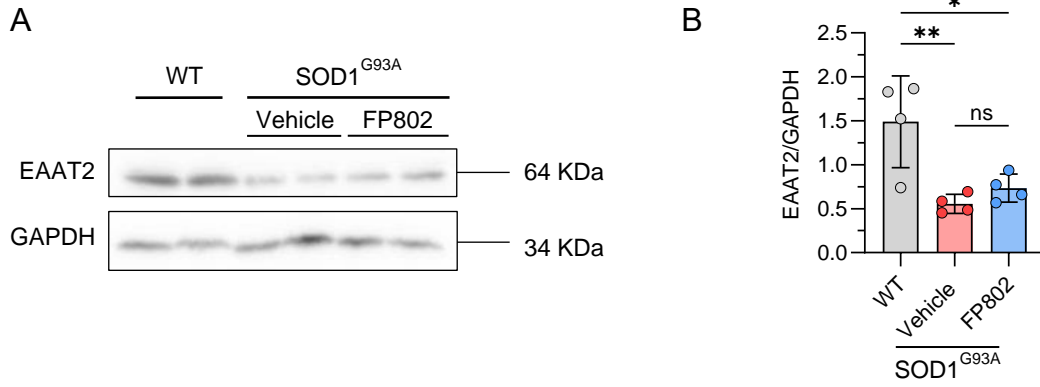

**Figure S2. FP802 treatment does not affect EAAT2/GLT1 expression.** Immunoblot analysis of EAAT2 and GAPDH expression in the lumbar spinal cord of 19-week-old wild type (WT) and in SOD1<sup>G93A</sup> mice treated for 4 weeks with vehicle or FP802 (40 mg/kg/day) starting at week 15. **(A)** Representative immunoblots and **(B)** quantitative analysis. Data represent means ± SD, n = 4; ns: no significance, \*p < 0.05, \*\*p < 0.01, one-way ANOVA followed by Tukey's multiple-comparisons test. Related to Figure 2.

| Assay  | ASCII assay name                             | Ligand or substrate                   | Species | Tissue/Cell                   | % inhibition | Time | Temperature |
|--------|----------------------------------------------|---------------------------------------|---------|-------------------------------|--------------|------|-------------|
| 200510 | Adenosine A1                                 | [3H] DPCPX                            | Human   | recombinant                   | -10.6        | 90   | 25          |
| 200610 | Adenosine A2A                                | [3H] CGS-21680                        | Human   | recombinant                   | 8.7          | 90   | 25          |
| 203110 | Adrenergic alpha1A                           | [3H] Prazosin                         | Human   | recombinant                   | -12.0        | 60   | 25          |
| 203210 | Adrenergic alpha1B                           | [3H] Prazosin                         | Human   | recombinant                   | -6.3         | 60   | 25          |
| 203630 | Adrenergic alpha2A                           | [3H] Rauwolscine                      | Human   | recombinant                   | 1.4          | 60   | 25          |
| 204010 | Adrenergic beta1                             | [125I] Cyanopindolol                  | Human   | recombinant                   | -10.5        | 120  | 25          |
| 204110 | Adrenergic beta2                             | [3H] CGP-12177                        | Human   | recombinant                   | -4.7         | 60   | 25          |
| 204410 | Transporter, Norepinephrine (NET)            | [125I] RTI-55                         | Human   | recombinant                   | -6.9         | 180  | 4           |
| 214600 | Calcium Channel L-Type, Dihydropyridine      | [3H] Nitrendipine                     | Rat     | cerebral cortex               | -3.0         | 90   | 25          |
| 217050 | Cannabinoid CB1                              | [3H] SRI141716A                       | Human   | recombinant                   | 3.5          | 60   | 37          |
| 219500 | Dopamine D1                                  | [3H] SCH-23390                        | Human   | recombinant                   | -1.6         | 120  | 37          |
| 219700 | Dopamine D2S                                 | [3H] Spiperone                        | Human   | recombinant                   | -7.2         | 120  | 25          |
| 226500 | GABAA, Muscimol, Central                     | [3H] Muscimol                         | Rat     | brain (minus cerebellum)      | -7.6         | 10   | 4           |
| 226600 | GABAA, Flunitrazepam, Central                | [3H] Flunitrazepam                    | Rat     | brain (minus cerebellum)      | -0.3         | 60   | 25          |
| 233000 | Glutamate, NMDA, Phencyclidine               | [3H] TCP                              | Rat     | cerebral cortex               | -5.0         | 45   | 25          |
| 239610 | Histamine H1                                 | [3H] Pyrilamine                       | Human   | recombinant                   | 20.5         | 180  | 25          |
| 241000 | Imidazoline I2, Central                      | [3H] Idazoxan                         | Rat     | brain (minus cerebellum)      | -9.2         | 30   | 25          |
| 252710 | Muscarinic M2                                | [3H] N-Methylscopolamine              | Human   | recombinant                   | 1.0          | 120  | 25          |
| 252810 | Muscarinic M3                                | [3H] N-Methylscopolamine              | Human   | recombinant                   | -5.5         | 120  | 25          |
| 258700 | Nicotinic Acetylcholine Alpha1, Bungarotoxin | [125I] alpha-Bungarotoxin             | Human   | RD cells                      | 12.0         | 120  | 25          |
| 258730 | Nicotinic Acetylcholine alpha3beta4          | [125I] Epibatidine                    | Human   | recombinant                   | -6.3         | 60   | 25          |
| 260410 | Opiate mu (OP3, MOP)                         | [3H] Diprenorphine                    | Human   | recombinant                   | 11.0         | 60   | 25          |
| 264500 | Phorbol Ester                                | [3H] PDBu                             | Mouse   | brain (minus cerebellum)      | 21.6         | 60   | 25          |
| 265600 | Potassium Channel [KATP]                     | [3H] Glyburide                        | Hamster | pancreatic HIT-T15 beta cells | -3.9         | 120  | 25          |
| 265900 | Potassium Channel hERG                       | [3H] Astemizole                       | Human   | recombinant                   | -18.4        | 60   | 25          |
| 268420 | Prostanoid EP4                               | [3H] Prostaglandin E2 (PGE2)          | Human   | recombinant                   | 3.7          | 120  | 25          |
| 270000 | Rolipram                                     | [3H] Rolipram                         | Rat     | brain                         | -17.9        | 60   | 4           |
| 271700 | Serotonin (5-Hydroxytryptamine) 5-HT2B       | [3H] Lysergic acid diethylamide (LSD) | Human   | recombinant                   | 2.3          | 60   | 37          |
| 279510 | Sodium Channel, Site 2                       | [3H] Batrachotoxinin                  | Rat     | brain (minus cerebellum)      | -14.5        | 60   | 37          |
| 299034 | Sigma1                                       | [3H] Pentazocine                      | Human   | Jurkat cells                  | 31.3         | 120  | 37          |

**Table S1. Pharmacology safety profile of FP802.**

No significant binding activities of FP802 (10  $\mu$ M) were found in the above-listed assays. Related to Figure 1.

| Hematology                        |                           | SOD1 <sup>G93A</sup> |                  |   |              | Reference    |
|-----------------------------------|---------------------------|----------------------|------------------|---|--------------|--------------|
|                                   |                           | Vehicle              | FP802            | n | Significance | 95% Interval |
| Erythrocytes<br>(Red blood cells) | Erythrocyte (T/L)         | 10.70 ± 0.28         | 10.08 ± 0.38     | 4 | no           | 7.14-12.20   |
|                                   | Reticulocyte (%)          | 4.92 ± 0.32          | 5.10 ± 0.81      | 4 | no           | -            |
|                                   | Hematocrit (%)            | 53.50 ± 3.11         | 50.25 ± 1.71     | 4 | no           | 37.3-62.0    |
|                                   | Anisocytosis (%)          | 0                    | 0                | 4 | n.a.         | -            |
| Leukocytes<br>(White blood cells) | Leukocytes (G/L)          | 2.75 ± 0.51          | 3.53 ± 1.32      | 4 | no           | 4.45-13.96   |
|                                   | Lymphocyte (%)            | 70.75 ± 6.95         | 71.50 ± 5.57     | 4 | no           | -            |
|                                   | Monocyte (%)              | 4.25 ± 2.22          | 4.25 ± 1.26      | 4 | no           | -            |
|                                   | Segmented neutrophils (%) | 24.50 ± 9.43         | 22.50 ± 6.40     | 4 | no           | -            |
|                                   | Band neutrophils          | 0                    | 0                | 4 | n.a.         | -            |
|                                   | Basophils (%)             | 0                    | 0                | 4 | n.a.         | -            |
|                                   | Eosinophils (%)           | 0.50 ± 1.00          | 0.25 ± 0.50      | 4 | no           | -            |
| Other types of cells              | Thrombocytes (G/L)        | 1490.00 ± 188.10     | 1506.00 ± 174.68 | 4 | no           | 841-2159     |
|                                   | Atypical cells            | 0                    | 0                | 4 | n.a.         | -            |
| Other parameters                  | MCV (fL)                  | 50.00 ± 1.41         | 49.75 ± 0.50     | 5 | no           | 42.7-56.0    |
|                                   | MCHC (g/dL)               | 27.75 ± 0.96         | 28.50 ± 0.58     | 5 | no           | 24.6-34.9    |
|                                   | MCH (pg)                  | 13.85 ± 0.19         | 14.00 ± 0.12     | 5 | no           | 11.7-16.3    |
|                                   | Hemoglobin (g/dL)         | 14.83 ± 0.46         | 14.13 ± 0.68     | 5 | no           | 10.8-19.2    |

**Table S2. Hematology of SOD1<sup>G93A</sup> mice treated with vehicle or FP802.**

FP802 delivered with a subcutaneously implanted ALZET osmotic pump at 40 mg/kg/day for 4 weeks starting at 15 weeks of age had no adverse effects on the hematology of SOD1<sup>G93A</sup> mice. References were from Charles River Laboratories datasheets for C57BL6 mice. Related to Figure 2.

| Serum clinical chemistry           |                              | SOD1 <sup>G93A</sup> |                 |   |              | Reference    |
|------------------------------------|------------------------------|----------------------|-----------------|---|--------------|--------------|
|                                    |                              | Vehicle              | FP802           | n | Significance | 95% Interval |
| Liver function-related parameters  | Albumin (g/L)                | 26.80 ± 2.17         | 28.00 ± 1.00    | 5 | no           | 28-38        |
|                                    | Alkaline phosphatase (U/L)   | 80.80 ± 22.72        | 69.40 ± 6.84    | 5 | no           | 111-275      |
|                                    | ALT (U/L)                    | 35.20 ± 3.42         | 32.60 ± 8.30    | 5 | no           | 28-129       |
|                                    | AST (U/L)                    | 177.20 ± 74.85       | 195.20 ± 147.29 | 5 | no           | 46-392       |
|                                    | GGT                          | Not detectable       | Not detectable  | 5 | n.a.         | 0-8          |
| Ions                               | Calcium (mmol/L)             | 2.38 ± 0.08          | 2.35 ± 0.06     | 5 | no           | 2.4-3.2      |
|                                    | Potassium (mmol/L)           | 7.50 ± 3.17          | 9.02 ± 3.83     | 5 | no           | 7.6-11.2     |
|                                    | Sodium (mmol/L)              | 151.8 ± 2.5          | 149.6 ± 3.9     | 5 | no           | 145.2-176.2  |
|                                    | Chloride (mmol/L)            | 112.00 ± 1.00        | 111.20 ± 3.03   | 5 | no           | 110.7-129.8  |
|                                    | Inorganic phosphate (mmol/L) | 3.22 ± 0.61          | 3.26 ± 0.18     | 5 | no           | 2.6-4.7      |
| Kidney function-related parameters | Creatine kinase (U/L)        | 1265 ± 1506          | 1500 ± 1475     | 5 | no           | -            |
|                                    | Creatinine (µmol/L)          | 8.00 ± 3.56          | 9.00 ± 2.16     | 4 | no           | 17.7-44.2    |
| Other parameters                   | Cholesterol (mmol/L)         | 2.52 ± 0.86          | 2.68 ± 0.60     | 5 | no           | 1.8-4.4      |
|                                    | LDH (U/L)                    | 699.5 ± 337.0        | 813.3 ± 474.5   | 5 | no           | -            |
|                                    | Lipase (U/L)                 | 33.25 ± 7.89         | 32.80 ± 4.15    | 4 | no           | -            |
|                                    | Total protein (g/L)          | 48.20 ± 2.95         | 50.00 ± 0.71    | 5 | no           | 48-70        |
|                                    | Triglycerides (g/L)          | 0.62 ± 0.33          | 0.48 ± 0.13     | 5 | no           | 0.67-2.78    |
|                                    | Urea (BUN) (mmol/L)          | 7.25 ± 1.02          | 7.58 ± 1.32     | 5 | no           | 2.5-10.0     |

**Table S3. Clinical chemistry serum parameters of SOD1<sup>G93A</sup> mice treated with vehicle or FP802.** FP802 delivered with a subcutaneously implanted ALZET osmotic pump at 40 mg/kg/day for 4 weeks starting at 15 weeks of age had no adverse effects on the serum clinical chemistry parameters of SOD1<sup>G93A</sup> mice. References were from Charles River Laboratories datasheets for C57BL6 mice. Related to Figure 2.
